# Supplementary material for: Association of Cantonese dietary patterns with mortality risk in older Chinese: a 16-year follow-up of a Guangzhou Biobank cohort study
Source: Royal Society of Chemistry journal article supplement (doi:10.1039/d3fo03766e), 2024-01-01
Supplement: d3fo03766e1.pdf [file d3fo03766e1.pdf]

Supplementary file

Supplementary Table 1 Food groups used in the dietary analysis

Supplementary Figure 1 Scree plot for factor analysis with 27 food groups

Supplementary Figure 2 Flowchart showing selection of participants included in the present analysis from Guangzhou Biobank Cohort Study

Supplementary Table 2 Association of dietary pattern scores with cancer-specific and CVD-specific mortality

Supplementary Table 3 Food and nutrient intake across quartiles of dietary patterns derived by principal component analysis

Supplementary Table 4 Association of dietary pattern scores with all-cause, cancer, CVD and other-cause mortality by excluding deaths during first three years follow-up

Supplementary Table 5 Association of dietary pattern scores with cancer-specific and CVD-specific mortality by excluding deaths during first three years follow-up

Supplementary Table 6 Association of dietary pattern scores with all-cause, cancer, CVD and other-cause mortality by further adjusting for the aspirin or other antiplatelet medications regularly

Supplementary Table 7 Association of dietary pattern scores with cancer-specific and CVD-specific mortality by further adjusting for the aspirin or other antiplatelet medications regularly

Supplementary Figure 3 Association of vegetable-based dietary pattern score with mortality of all-cause, cancer and CVD by subgroup

Supplementary Figure 4 Association of healthy Cantonese dietary pattern scores with mortality of all-cause, cancer and CVD by subgroup

Supplementary Figure 5 Association of unhealthy western dietary pattern scores with mortality of all-cause, cancer and CVD by subgroup

Supplementary Figure 6 Association of nut and fruit dietary pattern scores with mortality of all-cause, cancer and CVD by subgroup

**Supplementary Table 1** Food groups used in the dietary analysis \*

| No. | Food group               | Food item                                                                                                                                                                                                                                                                                             |
|-----|--------------------------|-------------------------------------------------------------------------------------------------------------------------------------------------------------------------------------------------------------------------------------------------------------------------------------------------------|
| 1   | Whole grain              | Oatmeal; corn flake; whole wheat bread; sweet corn; canned sweet corn                                                                                                                                                                                                                                 |
| 2   | Refined grain            | Cooked rice; soft rice; congee; mixed rice congee; wheat noodle; instant noodle; flattened rice noodle; mann-tau; plain roll; bread; sweet roll; croissant; yau-char-kwai; cream cracker; semi-sweet biscuit; chocolate coated biscuit; cookies; walnut short cake; spongy cake; madeira cake         |
| 3   | Green vegetables         | Chinese flowering cabbage; Chinese cabbage; Chinese kale; broccoli; lettuce; Chinese spinach; Chinese chives; cabbage; watercress; water spanish; asparagus; celery; spinach; pea shoot; mustard green; hairy melon; cucumber; bitter; angled loofah; turnips (green); green pepper; preserved radish |
| 4   | Orange/yellow vegetables | Cauliflower; pumpkin; carrot                                                                                                                                                                                                                                                                          |
| 5   | Red/purple vegetables    | Tomato; red pepper                                                                                                                                                                                                                                                                                    |
| 6   | White vegetables         | Winter melon; eggplant; onion; radish; water chestnut; lotus root; sprout mungbean; soybean sprout; fresh mushroom; dried mushroom; canned mushroom; white fungus; wood fungus                                                                                                                        |
| 7   | Starchy vegetables       | Sweet potato; potato (baked/boiled); potato chips; potato crisps; hash brown                                                                                                                                                                                                                          |
| 8   | Legume                   | Fresh soybean; red bean; brow bean; lentil; snap bean; snow bean; pea; string bean                                                                                                                                                                                                                    |
| 9   | Orange/yellow fruits     | Orange; honeydew melon; mango; papaya; pineapple; lemon; pomelo; persimmon; kiwifruit; peach                                                                                                                                                                                                          |
| 10  | Red/purple fruits        | Grape fruit; strawberry; watermelon; prune; apricot; grapes; cherry; raspberries; dried raisin; dried date                                                                                                                                                                                            |
| 11  | Fishes                   | Grass fish; big head fish; mud carp dace fish; eel; Japanese eel; blace; golden thread fish; snakehead fish; carp; cat fish; garouper; mackerel; ribbon fish; big eye fish; fish ball; fish cake; mud carp ball; cod fish                                                                             |
| 12  | Seafoods                 | Squid; oyster; dried oyster; prawn; crab; lobster; scallop; sea cucumber; ink fish; jelly fish                                                                                                                                                                                                        |
| 13  | Red meat                 | Lean pork; lean & fat pork; lean sparerib; lean & fat sparerib; lean roasted pork; fried steak; ox belly; lamp; pig liver; pig heart; pig kidney; beef oval                                                                                                                                           |
| 14  | Poultry                  | Chicken with skin; chicken without skin; chicken meat; chicken mid-wing; chicken leg quarter; roast goose with skin; roast goose without skin; roast dusk with skin; roast dusk without skin; roast pigeon; chicken heart; chicken kidney; chicken paw                                                |
| 15  | Processed meat           | Chinese sausage; preserved pork; ham; luncheon meat; bacon; dry beef; pork stick; beef floss; pork floss; squid thread; salted fish; salmon (smoked); sardines; fried dace                                                                                                                            |
| 16  | Eggs                     | Boiled egg; fried egg; limed duck egg; salted duck egg; quail egg; egg white; egg yolk                                                                                                                                                                                                                |
| 17  | Milk                     | Cow milk; skim milk; chocolate milk; dried whole milk; dried skimmed milk                                                                                                                                                                                                                             |
| 18  | Dairy products           | Ice cream; milk shake; madeira cake; sweetened condensed milk                                                                                                                                                                                                                                         |
| 19  | Alcohol                  | Beer; Chinese rice wine (high strength); western table wine; spirits; Chinese rice wine (low strength)                                                                                                                                                                                                |
| 20  | Tea                      | Green tea; oolong tea; black tea; other                                                                                                                                                                                                                                                               |
| 21  | Water                    | Mineral water; plain water                                                                                                                                                                                                                                                                            |
| 22  | Juice                    | Fresh fruit juice                                                                                                                                                                                                                                                                                     |

|    |                     |                                                                                                                                                                            |
|----|---------------------|----------------------------------------------------------------------------------------------------------------------------------------------------------------------------|
| 23 | Plant oil           | Vegetable oil; olive oil; canola oil; margarine; mixed oil; salad dressing                                                                                                 |
| 24 | Sugar               | Chocolate; candy; honey; syrup; white sugar                                                                                                                                |
| 25 | Nuts                | Chestnut; cashew nut; peanut; walnut; almond                                                                                                                               |
| 26 | Guangdong<br>dimsum | Red bean tong sui; barbecue pork bun; wan tonne; lotus seed bun; steamed dim sum; deep<br>fried dim sum; steamed cheung fan; Chinese turnip pudding; sticky rice dumpling; |
| 27 | Cantonese soup      | Vegetables soup; melon soup; fish soup; chicken soup; meat (pork) soup; mixed vegetables<br>soup; cream of chicken soup                                                    |

\*All food items were categorized according to their nutritional composition and taxonomy

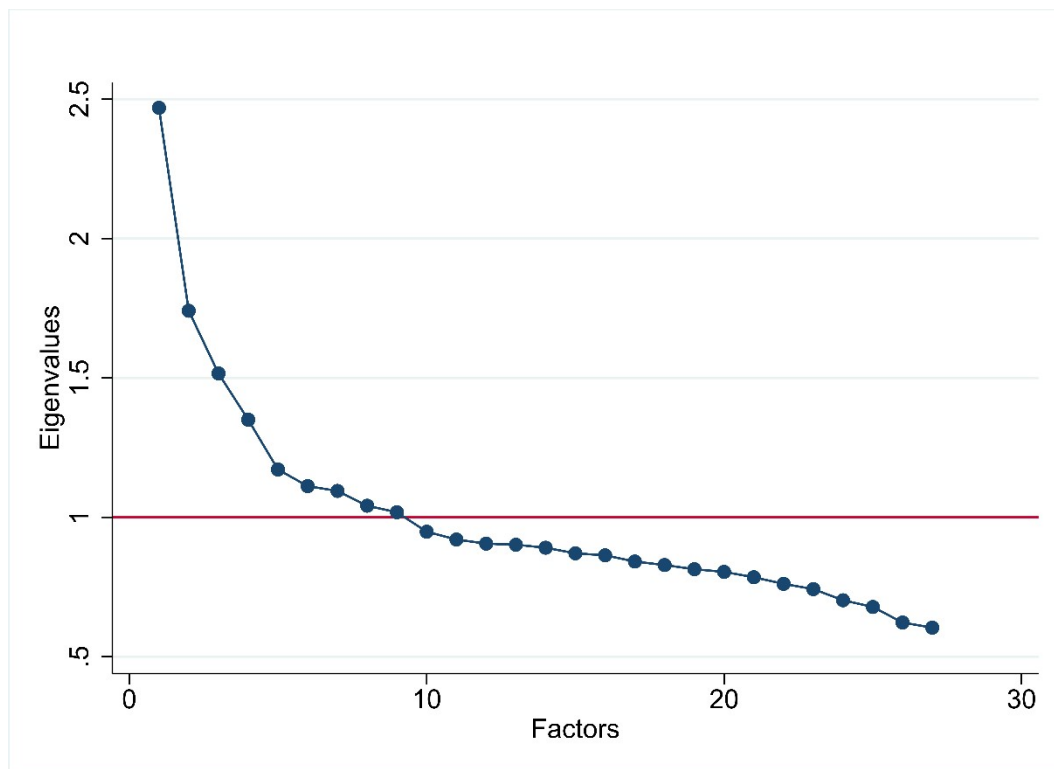

**Supplementary Figure 1** Scree plot for factor analysis with 27 food groups. Scree plot was used to explained factors for the retained principal components. We retained the factors that was based on the top four eigenvalues.

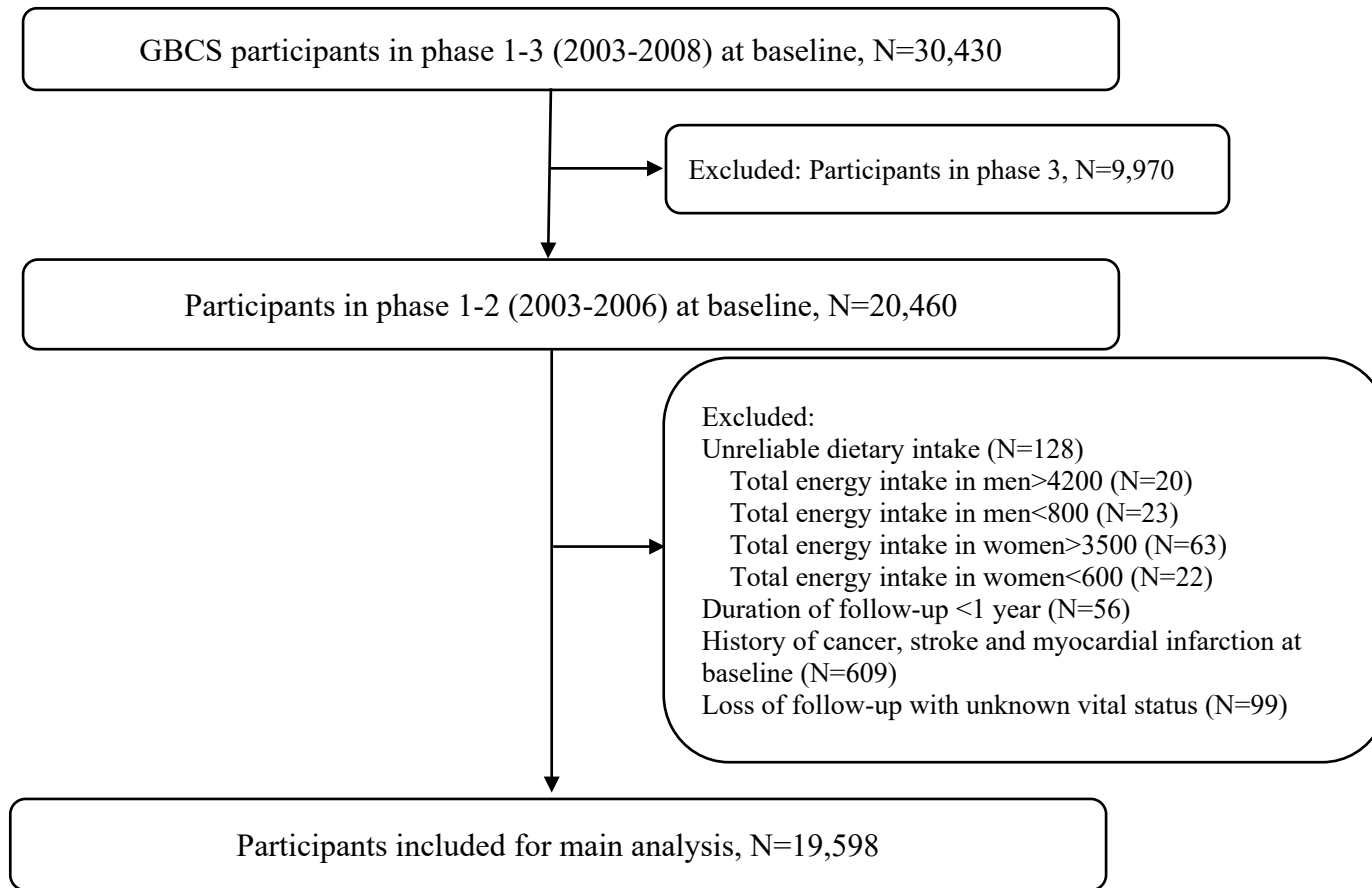

**Supplementary Figure 2** Flowchart showing selection of participants included in the present analysis from Guangzhou Biobank Cohort Study

**Supplementary Table 2** Association of dietary pattern scores with cancer-specific and CVD-specific mortality

|                                          | Quartiles of dietary pattern score |                  |                    |                    | P for trend |
|------------------------------------------|------------------------------------|------------------|--------------------|--------------------|-------------|
|                                          | Q1                                 | Q2               | Q3                 | Q4                 |             |
| <b>Cancer-specific</b>                   |                                    |                  |                    |                    |             |
| <b>Vegetable-based dietary pattern</b>   |                                    |                  |                    |                    |             |
| Lung cancer mortality                    |                                    |                  |                    |                    |             |
| Adjusted HR (95% CI) <sup>1</sup>        | 1.00                               | 1.06 (0.81-1.39) | 1.01 (0.77-1.34)   | 1.21 (0.92-1.60)   | 0.21        |
| Liver cancer mortality                   |                                    |                  |                    |                    |             |
| Adjusted HR (95% CI) <sup>1</sup>        | 1.00                               | 1.40 (0.97-2.05) | 1.23 (0.83-1.82)   | 1.30 (0.87-1.94)   | 0.41        |
| Stomach cancer mortality                 |                                    |                  |                    |                    |             |
| Adjusted HR (95% CI) <sup>1</sup>        | 1.00                               | 1.32 (0.68-2.56) | 1.03 (0.51-2.09)   | 0.80 (0.37-1.73)   | 0.40        |
| Esophageal cancer mortality              |                                    |                  |                    |                    |             |
| Adjusted HR (95% CI) <sup>1</sup>        | 1.00                               | 0.58 (0.23-1.48) | 0.61 (0.24-1.52)   | 0.66 (0.26-1.69)   | 0.48        |
| Intestines cancer mortality              |                                    |                  |                    |                    |             |
| Adjusted HR (95% CI) <sup>1</sup>        | 1.00                               | 1.36 (0.91-2.05) | 1.19 (0.78-1.83)   | 1.23 (0.79-1.91)   | 0.60        |
| <b>Healthy Cantonese dietary pattern</b> |                                    |                  |                    |                    |             |
| Lung cancer mortality                    |                                    |                  |                    |                    |             |
| Adjusted HR (95% CI) <sup>1</sup>        | 1.00                               | 0.93 (0.73-1.19) | 0.72 (0.55-0.94) * | 0.78 (0.59-0.99) * | 0.02        |
| Liver cancer mortality                   |                                    |                  |                    |                    |             |
| Adjusted HR (95% CI) <sup>1</sup>        | 1.00                               | 1.11 (0.78-1.58) | 1.19 (0.83-1.70)   | 0.92 (0.61-1.38)   | 0.76        |
| Stomach cancer mortality                 |                                    |                  |                    |                    |             |
| Adjusted HR (95% CI) <sup>1</sup>        | 1.00                               | 1.22 (0.63-2.37) | 1.15 (0.57-2.33)   | 1.28 (0.61-2.71)   | 0.58        |
| Esophageal cancer mortality              |                                    |                  |                    |                    |             |
| Adjusted HR (95% CI) <sup>1</sup>        | 1.00                               | 1.08 (0.41-2.84) | 1.55 (0.62-3.90)   | 1.11 (0.39-3.16)   | 0.68        |
| Intestines cancer mortality              |                                    |                  |                    |                    |             |
| Adjusted HR (95% CI) <sup>1</sup>        | 1.00                               | 1.28 (0.88-1.87) | 1.06 (0.70-1.60)   | 1.14 (0.73-1.78)   | 0.81        |

|                                          |      |                  |                  |                  |      |
|------------------------------------------|------|------------------|------------------|------------------|------|
| <b>Unhealthy western dietary pattern</b> |      |                  |                  |                  |      |
| Lung cancer mortality                    |      |                  |                  |                  |      |
| Adjusted HR (95% CI) <sup>1</sup>        | 1.00 | 0.96 (0.72-1.26) | 1.01 (0.77-1.31) | 0.92 (0.71-1.20) | 0.64 |
| Liver cancer mortality                   |      |                  |                  |                  |      |
| Adjusted HR (95% CI) <sup>1</sup>        | 1.00 | 0.87 (0.60-1.26) | 0.82 (0.56-1.18) | 1.28 (0.92-1.80) | 0.14 |
| Stomach cancer mortality                 |      |                  |                  |                  |      |
| Adjusted HR (95% CI) <sup>1</sup>        | 1.00 | 0.97 (0.46-2.04) | 1.11 (0.55-2.24) | 1.35 (0.68-2.69) | 0.33 |
| Esophageal cancer mortality              |      |                  |                  |                  |      |
| Adjusted HR (95% CI) <sup>1</sup>        | 1.00 | 0.47 (0.16-1.35) | 0.57 (0.22-1.49) | 1.21 (0.54-2.74) | 0.50 |
| Intestines cancer mortality              |      |                  |                  |                  |      |
| Adjusted HR (95% CI) <sup>1</sup>        | 1.00 | 0.99 (0.66-1.50) | 1.17 (0.79-1.73) | 1.28 (0.86-1.90) | 0.16 |
| <b>Nut and fruit dietary pattern</b>     |      |                  |                  |                  |      |
| Lung cancer mortality                    |      |                  |                  |                  |      |
| Adjusted HR (95% CI) <sup>1</sup>        | 1.00 | 1.19 (0.93-1.52) | 1.08 (0.83-1.39) | 1.26 (0.97-1.62) | 0.14 |
| Liver cancer mortality                   |      |                  |                  |                  |      |
| Adjusted HR (95% CI) <sup>1</sup>        | 1.00 | 1.02 (0.73-1.44) | 1.13 (0.81-1.58) | 1.11 (0.79-1.57) | 0.45 |
| Stomach cancer mortality                 |      |                  |                  |                  |      |
| Adjusted HR (95% CI) <sup>1</sup>        | 1.00 | 1.25 (0.66-2.40) | 0.75 (0.35-1.60) | 1.88 (0.98-3.54) | 0.12 |
| Esophageal cancer mortality              |      |                  |                  |                  |      |
| Adjusted HR (95% CI) <sup>1</sup>        | 1.00 | 2.03 (0.83-4.96) | 1.54 (0.60-3.96) | 1.77 (0.69-4.55) | 0.37 |
| Intestines cancer mortality              |      |                  |                  |                  |      |
| Adjusted HR (95% CI) <sup>1</sup>        | 1.00 | 0.91 (0.63-1.31) | 0.69 (0.46-1.03) | 1.00 (0.69-1.44) | 0.65 |
| <b>CVD-specific</b>                      |      |                  |                  |                  |      |
| <b>Vegetable-based dietary pattern</b>   |      |                  |                  |                  |      |
| Hypertensive heart disease mortality     |      |                  |                  |                  |      |
| Adjusted HR (95% CI) <sup>1</sup>        | 1.00 | 1.27 (0.80-1.99) | 1.38 (0.87-2.17) | 1.57 (0.98-2.49) | 0.06 |

|                                          |      |                  |                     |                     |       |
|------------------------------------------|------|------------------|---------------------|---------------------|-------|
| Ischemic heart disease mortality         |      |                  |                     |                     |       |
| Adjusted HR (95% CI) <sup>1</sup>        | 1.00 | 1.11 (0.90-1.36) | 1.23 (0.98-1.52)    | 1.15 (0.92-1.42)    | 0.19  |
| Cerebrovascular disease mortality        |      |                  |                     |                     |       |
| Adjusted HR (95% CI) <sup>1</sup>        | 1.00 | 0.95 (0.76-1.19) | 1.06 (0.85-1.33)    | 0.96 (0.76-1.21)    | 0.96  |
| <b>Healthy Cantonese dietary pattern</b> |      |                  |                     |                     |       |
| Hypertensive heart disease mortality     |      |                  |                     |                     |       |
| Adjusted HR (95% CI) <sup>1</sup>        | 1.00 | 0.86 (0.59-1.26) | 0.87 (0.58-1.30)    | 0.85 (0.54-1.34)    | 0.48  |
| Ischemic heart disease mortality         |      |                  |                     |                     |       |
| Adjusted HR (95% CI) <sup>1</sup>        | 1.00 | 0.98 (0.82-1.18) | 1.00 (0.82-1.21)    | 0.99 (0.80-1.22)    | 0.94  |
| Cerebrovascular disease mortality        |      |                  |                     |                     |       |
| Adjusted HR (95% CI) <sup>1</sup>        | 1.00 | 0.80 (0.64-1.01) | 0.73 (0.59-0.90) ** | 0.72 (0.59-0.88) ** | 0.01  |
| <b>Unhealthy western dietary pattern</b> |      |                  |                     |                     |       |
| Hypertensive heart disease mortality     |      |                  |                     |                     |       |
| Adjusted HR (95% CI) <sup>1</sup>        | 1.00 | 0.88 (0.58-1.32) | 1.00 (0.68-1.48)    | 0.91 (0.61-1.37)    | 0.82  |
| Ischemic heart disease mortality         |      |                  |                     |                     |       |
| Adjusted HR (95% CI) <sup>1</sup>        | 1.00 | 1.15 (0.95-1.39) | 0.98 (0.81-1.19)    | 1.02 (0.84-1.24)    | 0.78  |
| Cerebrovascular disease mortality        |      |                  |                     |                     |       |
| Adjusted HR (95% CI) <sup>1</sup>        | 1.00 | 1.02 (0.82-1.28) | 1.07 (0.86-1.33)    | 1.28 (1.03-1.58) *  | 0.02  |
| <b>Nut and fruit dietary pattern</b>     |      |                  |                     |                     |       |
| Hypertensive heart disease mortality     |      |                  |                     |                     |       |
| Adjusted HR (95% CI) <sup>1</sup>        | 1.00 | 0.86 (0.58-1.26) | 0.78 (0.52-1.17)    | 1.17 (0.80-1.71)    | 0.56  |
| Ischemic heart disease mortality         |      |                  |                     |                     |       |
| Adjusted HR (95% CI) <sup>1</sup>        | 1.00 | 0.99 (0.84-1.19) | 0.84 (0.70-0.99) *  | 0.83 (0.69-0.98) *  | 0.01  |
| Cerebrovascular disease mortality        |      |                  |                     |                     |       |
| Adjusted HR (95% CI) <sup>1</sup>        | 1.00 | 0.86 (0.71-1.04) | 0.75 (0.61-0.92) ** | 0.74 (0.60-0.91) ** | 0.002 |

<sup>1</sup> Adjusted for age, sex, total energy intake, education, family income, smoking, alcohol use, physical activity, BMI, history of CVD (excluding stroke or myocardial infarction) and diabetes.

\*:<0.05; \*\*:<0.01; \*\*\*:<0.001

**Supplementary Table 3** Food and nutrient intake across quartiles of dietary patterns derived by principal component analysis

|                                        | Quartiles of dietary pattern score |               |               |               |               | P-value |
|----------------------------------------|------------------------------------|---------------|---------------|---------------|---------------|---------|
|                                        | Total                              | Q1            | Q2            | Q3            | Q4            |         |
| <b>Vegetable-based dietary pattern</b> |                                    |               |               |               |               |         |
| Food group (g/day)                     |                                    |               |               |               |               |         |
| Whole grain                            | 27.5 (50.6)                        | 12.5 (29.1)   | 23.1 (44.6)   | 31.6 (54.5)   | 42.9 (62.9)   | <0.001  |
| Refined grain                          | 601.1 (227.4)                      | 502.3 (192.3) | 583.3 (209.5) | 651.9 (229.2) | 666.6 (237.6) | <0.001  |
| Green vegetables                       | 177.4 (112.5)                      | 116.8 (56.4)  | 157.6 (83.3)  | 189.3 (112.9) | 245.9 (137.4) | <0.001  |
| Orange/purple vegetables               | 9.9 (17.7)                         | 0.8 (2.8)     | 2.8 (5.7)     | 8.5 (11.0)    | 27.4 (25.6)   | <0.001  |
| Red/purple vegetables                  | 5.7 (12.1)                         | 0.2 (1.2)     | 1.1 (3.6)     | 4.3 (7.3)     | 17.3 (18.1)   | <0.001  |
| White vegetables                       | 20.3 (26.9)                        | 5.4 (7.7)     | 11.5 (13.0)   | 21.7 (21.1)   | 42.8 (37.7)   | <0.001  |
| Starchy vegetables                     | 3.5 (9.5)                          | 0.1 (1.2)     | 0.6 (2.7)     | 2.5 (5.8)     | 10.8 (15.6)   | <0.001  |
| Legume                                 | 11.5 (15.3)                        | 6.5 (9.1)     | 9.9 (12.0)    | 12.5 (15.3)   | 17.0 (20.3)   | <0.001  |
| Orange/purple fruits                   | 35.2 (52.0)                        | 29.1 (45.3)   | 34.8 (50.4)   | 36.6 (52.8)   | 40.2 (58.2)   | <0.001  |
| Red/purple fruits                      | 12.5 (22.6)                        | 13.4 (23.4)   | 11.5 (20.6)   | 11.8 (22.0)   | 13.2 (24.1)   | 0.10    |
| Fish                                   | 52.8 (43.0)                        | 33.6 (29.5)   | 49.8 (37.8)   | 59.3 (44.3)   | 68.4 (49.6)   | <0.001  |



|                                 |               |               |               |               |               |        |
|---------------------------------|---------------|---------------|---------------|---------------|---------------|--------|
| Seafood (excluding fish)        | 2.2 (4.9)     | 2.1 (4.8)     | 2.2 (4.7)     | 2.3 (5.0)     | 2.2 (5.1)     | 0.75   |
| Red meat                        | 56.8 (35.6)   | 58.9 (36.0)   | 56.6 (34.8)   | 55.5 (35.1)   | 56.1 (36.5)   | <0.001 |
| Processed meat                  | 3.3 (5.8)     | 3.4 (5.7)     | 3.3 (5.7)     | 3.3 (5.8)     | 3.2 (5.8)     | 0.19   |
| Poultry                         | 28.9 (24.1)   | 23.2 (21.1)   | 28.1 (22.9)   | 30.5 (24.2)   | 33.7 (26.6)   | <0.001 |
| Egg                             | 16.4 (14.7)   | 9.4 (9.3)     | 14.5 (12.5)   | 18.3 (14.9)   | 23.4 (17.0)   | <0.001 |
| Milk                            | 47.4 (83.1)   | 49.7 (82.9)   | 50.1 (82.8)   | 44.9 (81.8)   | 44.7 (84.7)   | <0.001 |
| Dairy products (excluding milk) | 1.5 (6.8)     | 2.5 (8.8)     | 1.4 (6.4)     | 1.2 (6.0)     | 1.0 (5.5)     | <0.001 |
| Plant oil                       | 20.6 (17.1)   | 26.9 (20.6)   | 19.3 (16.3)   | 18.5 (15.0)   | 17.6 (14.3)   | <0.001 |
| Water                           | 676.1 (426.4) | 617.0 (368.7) | 663.6 (405.3) | 700.6 (442.4) | 722.7 (474.3) | <0.001 |
| Fruit juice                     | 6.4 (22.9)    | 13.1 (32.3)   | 5.2 (19.7)    | 4.3 (18.5)    | 2.8 (15.9)    | <0.001 |
| Sugar                           | 0.9 (2.5)     | 0.9 (2.5)     | 1.0 (2.5)     | 0.9 (2.5)     | 0.9 (2.5)     | 0.18   |
| Nut                             | 5.2 (9.1)     | 3.3 (6.5)     | 5.1 (8.8)     | 5.8 (9.7)     | 6.7 (10.6)    | <0.001 |
| Guangdong dimsum                | 29.3 (37.4)   | 26.5 (34.4)   | 28.9 (35.6)   | 30.8 (38.5)   | 30.8 (40.7)   | <0.001 |
| Cantonese soup                  | 115.2 (110.2) | 84.8 (80.9)   | 110.1 (102.7) | 131.6 (120.2) | 134.2 (124.4) | <0.001 |
| Tea (cup/day)                   | 5.1 (4.7)     | 4.1 (4.2)     | 5.0 (4.6)     | 5.5 (4.9)     | 5.8 (5.0)     | <0.001 |
| Alcohol use                     | 8.8 (44.7)    | 7.8 (42.0)    | 8.6 (45.2)    | 10.3 (48.0)   | 8.6 (43.3)    | 0.22   |
| Nutrients                       |               |               |               |               |               |        |
| Protein (g/day)                 | 72.1 (22.8)   | 58.0 (17.3)   | 68.7 (18.5)   | 76.1 (21.0)   | 85.7 (24.3)   | <0.001 |
| Fat (g/day)                     | 57.8 (23.4)   | 57.3 (25.4)   | 55.0 (22.6)   | 57.7 (22.2)   | 61.3 (22.8)   | <0.001 |
| Carbohydrate (g/day)            | 260.6 (85.6)  | 211.9 (72.1)  | 248.8 (72.7)  | 278.1 (80.4)  | 303.4 (87.8)  | <0.001 |
| Fiber (g/day)                   | 13.1 (6.1)    | 8.7 (3.4)     | 11.5 (4.0)    | 14.1 (5.2)    | 18.2 (6.8)    | <0.001 |
| Cholesterol (mg/day)            | 148.0 (78.7)  | 117.4 (62.1)  | 142.9 (70.4)  | 158.2 (77.8)  | 173.4 (90.5)  | <0.001 |
| Saturated fatty (g/day)         | 10.0 (5.1)    | 9.4 (4.5)     | 9.6 (4.8)     | 10.2 (5.1)    | 11.0 (5.6)    | <0.001 |
| Monounsaturated fatty (g/day)   | 17.3 (8.8)    | 18.8 (10.2)   | 16.6 (8.7)    | 16.7 (8.2)    | 17.0 (8.0)    | 0.09   |
| Polyunsaturated fatty (g/day)   | 13.0 (8.3)    | 14.4 (9.5)    | 12.2 (7.8)    | 12.4 (7.8)    | 12.9 (7.8)    | 0.12   |
| Vitamin A ( $\mu$ g/day)        | 619.0 (490.2) | 410.0 (275.9) | 529.2 (350.9) | 649.3 (496.5) | 887.9 (625.1) | <0.001 |

|                                          |                 |                 |                 |                   |                 |        |
|------------------------------------------|-----------------|-----------------|-----------------|-------------------|-----------------|--------|
| Vitamin B1 ( μ g/day)                    | 1.0 (0.4)       | 0.9 (0.4)       | 1.0 (0.4)       | 1.0 (0.4)         | 1.2 (0.4)       | <0.001 |
| Vitamin B2 ( μ g/day)                    | 1.0 (0.4)       | 0.7 (0.3)       | 0.9 (0.3)       | 1.0 (0.3)         | 1.2 (0.4)       | <0.001 |
| Vitamin B3 ( μ g/day)                    | 23.5 (7.3)      | 19.2 (5.7)      | 22.4 (6.1)      | 24.9 (6.7)        | 27.3 (7.8)      | <0.001 |
| Vitamin C (mg/day)                       | 97.5 (61.4)     | 66.2 (35.6)     | 84.0 (42.8)     | 101.8 (60.8)      | 137.9 (74.0)    | <0.001 |
| Vitamin E (mg/day)                       | 18.4 (9.5)      | 18.2 (10.5)     | 16.8 (8.8)      | 17.9 (8.7)        | 20.8 (9.5)      | <0.001 |
| Sodium (mg/day)                          | 932.7 (648.5)   | 733.7 (370.6)   | 889.4 (432.6)   | 1,014.8 (1,002.6) | 1,092.9 (528.4) | <0.001 |
| Potassium (mg/day)                       | 1,659.2 (604.2) | 1,233.0 (387.0) | 1,506.2 (409.1) | 1,748.2 (513.4)   | 2,149.7 (653.0) | <0.001 |
| Phosphorus (mg/day)                      | 1,077.8 (338.2) | 845.9 (243.7)   | 1,016.3 (260.0) | 1,147.3 (304.3)   | 1,301.7 (354.1) | <0.001 |
| Calcium (mg/day)                         | 502.0 (235.0)   | 369.7 (160.4)   | 460.0 (178.5)   | 532.4 (229.8)     | 645.9 (264.0)   | <0.001 |
| Magnesium (mg/day)                       | 303.2 (128.0)   | 219.6 (78.1)    | 279.9 (94.4)    | 327.9 (120.8)     | 385.2 (145.0)   | <0.001 |
| Iron (mg/day)                            | 22.3 (7.6)      | 17.1 (5.2)      | 20.9 (5.6)      | 23.8 (6.9)        | 27.3 (8.2)      | <0.001 |
| Copper (mg/day)                          | 3.8 (4.2)       | 2.7 (2.6)       | 3.4 (3.6)       | 4.1 (4.3)         | 4.9 (5.5)       | <0.001 |
| Zinc (mg/day)                            | 11.6 (3.4)      | 9.4 (2.6)       | 11.1 (2.8)      | 12.3 (3.2)        | 13.7 (3.6)      | <0.001 |
| Selenium (mg/day)                        | 50.1 (20.9)     | 39.9 (15.7)     | 47.5 (17.6)     | 52.8 (20.4)       | 60.1 (23.7)     | <0.001 |
| Manganese (mg/day)                       | 5.6 (2.3)       | 4.2 (1.5)       | 5.2 (1.8)       | 6.1 (2.2)         | 6.9 (2.6)       | <0.001 |
| <b>Healthy Cantonese dietary pattern</b> |                 |                 |                 |                   |                 |        |
| Food groups                              |                 |                 |                 |                   |                 |        |
| Whole grain                              | 27.5 (50.6)     | 23.2 (47.6)     | 27.8 (51.8)     | 29.2 (51.2)       | 29.9 (51.6)     | <0.001 |
| Refined grain                            | 601.1 (227.4)   | 533.7 (204.9)   | 583.4 (220.2)   | 620.8 (227.9)     | 666.3 (234.3)   | <0.001 |
| Green vegetables                         | 177.4 (112.5)   | 137.5 (86.1)    | 165.7 (102.2)   | 185.3 (113.9)     | 221.0 (127.0)   | <0.001 |
| Orange/purple vegetables                 | 9.9 (17.7)      | 8.7 (16.5)      | 8.8 (16.2)      | 10.5 (18.3)       | 11.6 (19.6)     | <0.001 |
| Red/purple vegetables                    | 5.7 (12.1)      | 5.0 (11.3)      | 5.3 (11.7)      | 6.0 (12.2)        | 6.4 (12.9)      | <0.001 |
| White vegetables                         | 20.3 (26.9)     | 11.2 (16.9)     | 17.3 (22.8)     | 22.0 (26.9)       | 30.8 (34.2)     | <0.001 |
| Starchy vegetables                       | 3.5 (9.5)       | 4.1 (10.7)      | 3.3 (9.0)       | 3.5 (9.3)         | 3.2 (8.9)       | 0.20   |
| Legume                                   | 11.5 (15.3)     | 6.7 (10.9)      | 9.7 (13.1)      | 12.9 (16.0)       | 16.5 (18.2)     | <0.001 |
| Orange/purple fruits                     | 35.2 (52.0)     | 22.9 (39.4)     | 32.8 (48.5)     | 37.9 (53.0)       | 47.2 (61.7)     | <0.001 |

|                                 |               |               |               |               |               |        |
|---------------------------------|---------------|---------------|---------------|---------------|---------------|--------|
| Red/purple fruits               | 12.5 (22.6)   | 2.7 (8.3)     | 7.1 (14.0)    | 13.0 (20.5)   | 27.1 (31.9)   | <0.001 |
| Fish                            | 52.8 (43.0)   | 33.9 (32.4)   | 48.2 (37.2)   | 58.3 (43.2)   | 70.7 (48.6)   | <0.001 |
| Seafood (excluding fish)        | 2.2 (4.9)     | 0.4 (1.4)     | 1.0 (2.5)     | 2.1 (4.0)     | 5.5 (7.5)     | <0.001 |
| Red meat                        | 56.8 (35.6)   | 41.7 (26.9)   | 52.3 (29.9)   | 59.2 (33.7)   | 73.8 (42.1)   | <0.001 |
| Processed meat                  | 3.3 (5.8)     | 3.2 (5.5)     | 3.3 (5.6)     | 3.3 (5.9)     | 3.4 (6.1)     | 0.47   |
| Poultry                         | 28.9 (24.1)   | 14.0 (14.8)   | 23.8 (18.0)   | 32.7 (22.2)   | 44.9 (27.6)   | <0.001 |
| Egg                             | 16.4 (14.7)   | 11.5 (12.3)   | 15.1 (13.7)   | 17.9 (14.8)   | 21.2 (15.9)   | <0.001 |
| Milk                            | 47.4 (83.1)   | 25.5 (61.9)   | 44.8 (80.8)   | 57.3 (89.6)   | 61.8 (91.9)   | <0.001 |
| Dairy products (excluding milk) | 1.5 (6.8)     | 0.1 (1.1)     | 0.2 (2.1)     | 0.9 (4.9)     | 4.7 (11.9)    | <0.001 |
| Plant oil                       | 20.6 (17.1)   | 19.3 (16.7)   | 21.1 (17.4)   | 21.4 (17.2)   | 20.6 (17.1)   | 0.15   |
| Water                           | 676.1 (426.4) | 582.7 (380.8) | 667.3 (413.4) | 703.8 (428.3) | 750.2 (461.4) | <0.001 |
| Fruit juice                     | 6.4 (22.9)    | 0.6 (5.1)     | 1.9 (10.3)    | 4.6 (17.1)    | 18.2 (38.4)   | <0.001 |
| Sugar                           | 0.9 (2.5)     | 1.0 (2.7)     | 0.9 (2.5)     | 0.9 (2.4)     | 0.9 (2.4)     | 0.86   |
| Nut                             | 5.2 (9.1)     | 3.6 (7.2)     | 4.8 (8.6)     | 5.8 (9.7)     | 6.7 (10.4)    | <0.001 |
| Guangdong dimsum                | 29.3 (37.4)   | 12.8 (20.3)   | 23.2 (29.3)   | 32.5 (37.1)   | 48.4 (47.6)   | <0.001 |
| Cantonese soup                  | 115.2 (110.2) | 55.1 (59.3)   | 91.8 (79.6)   | 127.3 (102.5) | 186.5 (137.3) | <0.001 |
| Tea (cup/day)                   | 5.1 (4.7)     | 4.5 (4.5)     | 4.9 (4.6)     | 5.2 (4.7)     | 5.8 (4.9)     | <0.001 |
| Alcohol use                     | 8.8 (44.7)    | 6.1 (37.2)    | 7.3 (39.4)    | 9.6 (46.4)    | 12.3 (53.7)   | 0.02   |
| Nutrients                       |               |               |               |               |               |        |
| Protein (g/day)                 | 72.1 (22.8)   | 54.0 (15.0)   | 67.0 (15.8)   | 76.2 (17.5)   | 91.3 (23.7)   | <0.001 |
| Fat (g/day)                     | 57.8 (23.4)   | 44.6 (19.6)   | 54.8 (20.6)   | 61.4 (21.3)   | 70.4 (24.1)   | <0.001 |
| Carbohydrate (g/day)            | 260.6 (85.6)  | 218.2 (75.1)  | 248.1 (76.9)  | 270.5 (78.3)  | 305.5 (87.0)  | <0.001 |
| Fiber (g/day)                   | 13.1 (6.1)    | 10.2 (5.0)    | 12.3 (5.4)    | 13.8 (5.7)    | 16.1 (6.6)    | <0.001 |
| Cholesterol (mg/day)            | 148.0 (78.7)  | 136.9 (79.4)  | 137.3 (74.5)  | 148.1 (74.1)  | 169.6 (82.0)  | <0.001 |
| Saturated fatty (g/day)         | 10.0 (5.1)    | 7.9 (4.3)     | 9.7 (4.8)     | 10.6 (5.0)    | 11.9 (5.3)    | <0.001 |
| Monounsaturated fatty (g/day)   | 17.3 (8.8)    | 14.3 (7.9)    | 16.8 (8.6)    | 18.1 (8.7)    | 19.9 (9.2)    | <0.001 |

|                                          |                 |                 |                 |                 |                 |        |
|------------------------------------------|-----------------|-----------------|-----------------|-----------------|-----------------|--------|
| Polyunsaturated fatty (g/day)            | 13.0 (8.3)      | 11.3 (7.7)      | 13.0 (8.4)      | 13.6 (8.3)      | 14.0 (8.4)      | <0.001 |
| Vitamin A (µg/day)                       | 619.0 (490.2)   | 468.6 (377.6)   | 577.6 (434.1)   | 651.9 (483.0)   | 778.2 (588.6)   | <0.001 |
| Vitamin B1 (µg/day)                      | 1.0 (0.4)       | 0.8 (0.3)       | 1.0 (0.4)       | 1.0 (0.4)       | 1.2 (0.4)       | <0.001 |
| Vitamin B2 (µg/day)                      | 1.0 (0.4)       | 0.7 (0.3)       | 0.9 (0.3)       | 1.0 (0.3)       | 1.2 (0.4)       | <0.001 |
| Vitamin B3 (µg/day)                      | 23.5 (7.3)      | 18.2 (5.0)      | 22.0 (5.3)      | 24.8 (6.1)      | 28.8 (7.8)      | <0.001 |
| Vitamin C (mg/day)                       | 97.5 (61.4)     | 70.7 (43.0)     | 88.3 (52.0)     | 101.5 (58.3)    | 129.4 (72.7)    | <0.001 |
| Vitamin E (mg/day)                       | 18.4 (9.5)      | 15.2 (8.7)      | 17.8 (9.2)      | 19.5 (9.4)      | 21.2 (9.7)      | <0.001 |
| Sodium (mg/day)                          | 932.7 (648.5)   | 925.2 (991.1)   | 873.0 (461.9)   | 909.7 (465.2)   | 1,023.0 (508.5) | <0.001 |
| Potassium (mg/day)                       | 1,659.2 (604.2) | 1,223.2 (404.9) | 1,527.4 (439.7) | 1,757.7 (500.4) | 2,128.8 (644.3) | <0.001 |
| Phosphorus (mg/day)                      | 1,077.8 (338.2) | 832.1 (247.8)   | 1,011.3 (261.5) | 1,136.9 (281.5) | 1,330.9 (304.9) | <0.001 |
| Calcium (mg/day)                         | 502.0 (235.0)   | 375.4 (179.1)   | 471.3 (209.7)   | 534.2 (227.3)   | 627.2 (244.1)   | <0.001 |
| Magnesium (mg/day)                       | 303.2 (128.0)   | 237.8 (107.2)   | 285.3 (114.9)   | 318.2 (118.6)   | 371.2 (131.6)   | <0.001 |
| Iron (mg/day)                            | 22.3 (7.6)      | 18.0 (6.2)      | 21.1 (6.5)      | 23.3 (6.8)      | 26.8 (7.9)      | <0.001 |
| Copper (mg/day)                          | 3.8 (4.2)       | 2.7 (3.3)       | 3.6 (3.6)       | 4.1 (4.4)       | 4.7 (5.1)       | <0.001 |
| Zinc (mg/day)                            | 11.6 (3.4)      | 9.3 (2.5)       | 11.0 (2.7)      | 12.1 (2.9)      | 14.1 (3.6)      | <0.001 |
| Selenium (mg/day)                        | 50.1 (20.9)     | 38.1 (15.4)     | 46.6 (16.3)     | 52.7 (19.1)     | 63.0 (23.5)     | <0.001 |
| Manganese (mg/day)                       | 5.6 (2.3)       | 4.8 (2.1)       | 5.4 (2.2)       | 5.8 (2.2)       | 6.4 (2.4)       | <0.001 |
| <b>Unhealthy western dietary pattern</b> |                 |                 |                 |                 |                 |        |
| Food groups                              |                 |                 |                 |                 |                 |        |
| Whole grain                              | 27.5 (50.6)     | 56.8 (70.1)     | 24.7 (45.7)     | 18.1 (36.8)     | 10.5 (25.6)     | <0.001 |
| Refined grain                            | 601.1 (227.4)   | 545.4 (208.1)   | 583.9 (216.6)   | 611.7 (226.1)   | 663.1 (241.1)   | <0.001 |
| Green vegetables                         | 177.4 (112.5)   | 173.0 (109.1)   | 165.7 (102.9)   | 175.7 (111.8)   | 195.3 (123.3)   | <0.001 |
| Orange/purple vegetables                 | 9.9 (17.7)      | 10.6 (19.0)     | 8.5 (16.2)      | 9.2 (17.3)      | 11.2 (18.2)     | <0.001 |
| Red/purple vegetables                    | 5.7 (12.1)      | 6.1 (12.4)      | 5.0 (11.2)      | 5.1 (11.6)      | 6.6 (12.8)      | <0.001 |
| White vegetables                         | 20.3 (26.9)     | 23.3 (29.3)     | 18.6 (23.4)     | 18.6 (25.4)     | 20.8 (27.2)     | <0.001 |
| Starchy vegetables                       | 3.5 (9.5)       | 3.7 (9.8)       | 3.0 (8.7)       | 3.3 (9.3)       | 4.0 (10.1)      | <0.001 |

|                                 |               |               |               |               |               |        |
|---------------------------------|---------------|---------------|---------------|---------------|---------------|--------|
| Legume                          | 11.5 (15.3)   | 13.0 (16.0)   | 11.3 (14.8)   | 10.8 (14.8)   | 10.7 (15.3)   | <0.001 |
| Orange/purple fruits            | 35.2 (52.0)   | 36.3 (52.8)   | 34.7 (51.2)   | 35.8 (52.4)   | 34.0 (51.7)   | 0.15   |
| Red/purple fruits               | 12.5 (22.6)   | 19.2 (27.9)   | 12.4 (22.1)   | 10.4 (20.2)   | 8.0 (17.1)    | <0.001 |
| Fish                            | 52.8 (43.0)   | 51.9 (41.9)   | 50.3 (41.8)   | 51.8 (43.0)   | 57.1 (44.8)   | <0.001 |
| Seafood (excluding fish)        | 2.2 (4.9)     | 1.8 (4.3)     | 2.0 (4.5)     | 2.2 (4.8)     | 2.9 (5.8)     | <0.001 |
| Red meat                        | 56.8 (35.6)   | 44.4 (27.0)   | 51.9 (30.7)   | 58.6 (34.1)   | 72.1 (42.7)   | <0.001 |
| Processed meat                  | 3.3 (5.8)     | 1.7 (3.8)     | 2.8 (4.9)     | 3.7 (6.0)     | 5.0 (7.3)     | <0.001 |
| Poultry                         | 28.9 (24.1)   | 25.4 (21.8)   | 26.4 (22.5)   | 29.0 (23.6)   | 34.7 (27.0)   | <0.001 |
| Egg                             | 16.4 (14.7)   | 20.4 (16.5)   | 16.0 (14.3)   | 14.8 (13.7)   | 14.4 (13.2)   | <0.001 |
| Milk                            | 47.4 (83.1)   | 83.5 (103.0)  | 45.9 (80.0)   | 36.9 (72.1)   | 23.1 (58.5)   | <0.001 |
| Dairy products (excluding milk) | 1.5 (6.8)     | 2.6 (9.0)     | 1.5 (6.9)     | 1.2 (5.8)     | 0.7 (4.8)     | <0.001 |
| Plant oil                       | 20.6 (17.1)   | 18.9 (16.5)   | 20.4 (17.1)   | 21.2 (17.4)   | 21.8 (17.4)   | <0.001 |
| Water                           | 676.1 (426.4) | 1,026 (408.5) | 735.0 (331.7) | 572.2 (341.9) | 370.5 (321.1) | <0.001 |
| Fruit juice                     | 6.4 (22.9)    | 8.4 (26.7)    | 6.5 (22.9)    | 5.5 (20.0)    | 5.1 (21.2)    | 0.003  |
| Sugar                           | 0.9 (2.5)     | 0.7 (2.0)     | 0.9 (2.4)     | 1.0 (2.6)     | 1.1 (2.9)     | 0.001  |
| Nut                             | 5.2 (9.1)     | 5.1 (8.9)     | 4.8 (8.8)     | 5.2 (9.1)     | 5.8 (9.7)     | 0.04   |
| Guangdong dimsum                | 29.3 (37.4)   | 14.4 (21.9)   | 21.9 (28.6)   | 29.9 (33.8)   | 50.8 (49.2)   | <0.001 |
| Cantonese soup                  | 115.2 (110.2) | 124.5 (116.5) | 111.7 (107.5) | 109.7 (105.7) | 114.8 (110.2) | 0.02   |
| Tea (cup/day)                   | 5.1 (4.7)     | 1.7 (2.4)     | 3.0 (3.5)     | 5.8 (4.3)     | 9.8 (3.7)     | <0.001 |
| Alcohol use                     | 8.8 (44.7)    | 0.6 (5.7)     | 1.2 (9.7)     | 2.8 (19.8)    | 30.7 (82.6)   | <0.001 |
| Nutrients                       |               |               |               |               |               |        |
| Protein (g/day)                 | 72.1 (22.8)   | 72.3 (22.9)   | 68.3 (21.8)   | 70.8 (21.7)   | 77.2 (23.9)   | <0.001 |
| Fat (g/day)                     | 57.8 (23.4)   | 55.8 (22.3)   | 55.0 (22.7)   | 57.6 (21.1)   | 62.8 (24.6)   | <0.001 |
| Carbohydrate (g/day)            | 260.6 (85.6)  | 260.2 (84.7)  | 250.7 (83.2)  | 257.4 (83.6)  | 274.0 (89.0)  | <0.001 |
| Fiber (g/day)                   | 13.1 (6.1)    | 14.9 (7.0)    | 12.3 (5.8)    | 12.4 (5.7)    | 12.8 (5.4)    | <0.001 |
| Cholesterol (mg/day)            | 148.0 (78.7)  | 140.0 (74.7)  | 138.0 (74.7)  | 144.5 (72.5)  | 169.5 (87.9)  | <0.001 |

|                                      |                 |                 |                 |                 |                 |        |
|--------------------------------------|-----------------|-----------------|-----------------|-----------------|-----------------|--------|
| Saturated fatty (g/day)              | 10.0 (5.1)      | 11.2 (5.7)      | 9.5 (4.8)       | 9.5 (4.7)       | 9.7 (4.7)       | <0.001 |
| Monounsaturated fatty (g/day)        | 17.3 (8.8)      | 16.2 (8.2)      | 16.6 (8.6)      | 17.4 (9.0)      | 18.9 (9.3)      | <0.001 |
| Polyunsaturated fatty (g/day)        | 13.0 (8.3)      | 12.8 (8.1)      | 12.6 (8.2)      | 13.0 (8.4)      | 13.5 (8.4)      | <0.001 |
| Vitamin A (µg/day)                   | 619.0 (490.2)   | 587.0 (446.8)   | 569.6 (447.3)   | 616.0 (491.2)   | 703.6 (556.6)   | <0.001 |
| Vitamin B1 (µg/day)                  | 1.0 (0.4)       | 1.0 (0.4)       | 1.0 (0.4)       | 1.0 (0.4)       | 1.1 (0.4)       | 0.62   |
| Vitamin B2 (µg/day)                  | 1.0 (0.4)       | 1.0 (0.4)       | 0.9 (0.4)       | 0.9 (0.3)       | 1.0 (0.4)       | 0.15   |
| Vitamin B3 (µg/day)                  | 23.5 (7.3)      | 21.6 (6.4)      | 22.1 (6.5)      | 23.6 (7.0)      | 26.5 (8.1)      | <0.001 |
| Vitamin C (mg/day)                   | 97.5 (61.4)     | 99.0 (59.6)     | 91.6 (58.1)     | 95.8 (62.2)     | 103.4 (64.8)    | <0.001 |
| Vitamin E (mg/day)                   | 18.4 (9.5)      | 18.2 (9.4)      | 17.8 (9.4)      | 18.5 (9.6)      | 19.1 (9.6)      | <0.001 |
| Sodium (mg/day)                      | 932.7 (648.5)   | 598.1 (282.3)   | 820.6 (933.0)   | 997.8 (405.5)   | 1,314.4 (541.9) | <0.001 |
| Potassium (mg/day)                   | 1,659.2 (604.2) | 1,738.9 (622.6) | 1,567 (583.6)   | 1,608.4 (582.8) | 1,722.6 (609.3) | <0.001 |
| Phosphorus (mg/day)                  | 1,077.8 (338.2) | 1,124.4 (361.7) | 1,023.8 (328.1) | 1,043.8 (318.7) | 1,119.1 (331.1) | <0.001 |
| Calcium (mg/day)                     | 502.0 (235.0)   | 602.6 (266.8)   | 473.9 (219.4)   | 463.8 (211.9)   | 467.7 (207.9)   | <0.001 |
| Magnesium (mg/day)                   | 303.2 (128.0)   | 349.3 (157.2)   | 284.9 (122.5)   | 283.4 (11.6)    | 295.0 (101.9)   | <0.001 |
| Iron (mg/day)                        | 22.3 (7.6)      | 23.2 (8.3)      | 21.2 (7.3)      | 21.7 (7.2)      | 23.1 (7.3)      | <0.001 |
| Copper (mg/day)                      | 3.8 (4.2)       | 4.0 (4.3)       | 3.6 (4.0)       | 3.6 (4.0)       | 3.9 (4.6)       | <0.001 |
| Zinc (mg/day)                        | 11.6 (3.4)      | 11.7 (3.5)      | 11.1 (3.3)      | 11.4 (3.4)      | 12.3 (3.5)      | <0.001 |
| Selenium (mg/day)                    | 50.1 (20.9)     | 49.2 (20.4)     | 47.8 (19.3)     | 50.0 (20.6)     | 53.5 (22.9)     | <0.001 |
| Manganese (mg/day)                   | 5.6 (2.3)       | 6.3 (2.8)       | 5.4 (2.2)       | 5.3 (2.0)       | 5.4 (1.9)       | <0.001 |
| <b>Nut and fruit dietary pattern</b> |                 |                 |                 |                 |                 |        |
| Food groups                          |                 |                 |                 |                 |                 |        |
| Whole grain                          | 27.5 (50.6)     | 9.2 (21.2)      | 18.2 (36.3)     | 31.7 (52.8)     | 51.0 (68.7)     | <0.001 |
| Refined grain                        | 601.1 (227.4)   | 771.7 (234.7)   | 587.2 (196.5)   | 563.1 (192.7)   | 509.1 (184.3)   | <0.001 |
| Green vegetables                     | 177.4 (112.5)   | 166.3 (109.0)   | 174.0 (111.1)   | 195.3 (107.7)   | 194.0 (120.0)   | <0.001 |
| Orange/purple vegetables             | 9.9 (17.7)      | 9.3 (16.6)      | 9.3 (17.1)      | 9.7 (17.4)      | 11.3 (19.6)     | <0.001 |
| Red/purple vegetables                | 5.7 (12.1)      | 5.0 (10.5)      | 5.5 (11.6)      | 5.6 (12.1)      | 6.6 (13.8)      | 0.80   |

|                                 |               |               |               |               |               |        |
|---------------------------------|---------------|---------------|---------------|---------------|---------------|--------|
| White vegetables                | 20.3 (26.9)   | 25.6 (32.4)   | 19.7 (26.4)   | 17.8 (23.9)   | 18.2 (23.4)   | <0.001 |
| Starchy vegetables              | 3.5 (9.5)     | 2.8 (7.8)     | 3.1 (8.6)     | 3.7 (9.8)     | 4.4 (11.3)    | 0.06   |
| Legume                          | 11.5 (15.3)   | 9.0 (13.5)    | 10.7 (14.6)   | 12.2 (15.7)   | 13.9 (16.7)   | <0.001 |
| Orange/purple fruits            | 35.2 (52.0)   | 10.7 (22.6)   | 21.6 (34.1)   | 39.5 (49.2)   | 69.1 (69.1)   | <0.001 |
| Red/purple fruits               | 12.5 (22.6)   | 13.2 (23.6)   | 12.5 (22.6)   | 12.5 (21.8)   | 11.8 (22.4)   | <0.001 |
| Fish                            | 52.8 (43.0)   | 55.0 (46.0)   | 50.0 (41.8)   | 51.3 (41.6)   | 54.8 (41.3)   | 0.11   |
| Seafood (excluding fish)        | 2.2 (4.9)     | 1.3 (3.6)     | 1.8 (4.2)     | 2.3 (4.9)     | 3.5 (6.3)     | <0.001 |
| Red meat                        | 56.8 (35.6)   | 49.6 (32.1)   | 55.2 (34.1)   | 58.6 (36.4)   | 63.6 (38.1)   | <0.001 |
| Processed meat                  | 3.3 (5.8)     | 0.8 (2.1)     | 1.7 (3.3)     | 3.3 (5.0)     | 7.4 (8.2)     | <0.001 |
| Poultry                         | 28.9 (24.1)   | 27.1 (23.9)   | 27.9 (23.8)   | 28.9 (23.2)   | 31.6 (25.1)   | <0.001 |
| Egg                             | 16.4 (14.7)   | 12.9 (12.7)   | 15.4 (13.7)   | 17.3 (14.7)   | 20.1 (16.3)   | <0.001 |
| Milk                            | 47.4 (83.1)   | 17.1 (48.9)   | 35.0 (70.5)   | 55.8 (87.7)   | 81.5 (101.4)  | <0.001 |
| Dairy products (excluding milk) | 1.5 (6.8)     | 2.7 (9.3)     | 1.4 (6.4)     | 1.0 (5.5)     | 0.9 (5.1)     | <0.001 |
| Plant oil                       | 20.6 (17.1)   | 25.4 (20.0)   | 20.6 (16.9)   | 19.0 (15.8)   | 17.4 (14.2)   | <0.001 |
| Water                           | 676.1 (426.4) | 724.3 (473.9) | 687.7 (426.3) | 655.2 (403.0) | 636.7 (392.6) | <0.001 |
| Fruit juice                     | 6.4 (22.9)    | 4.8 (20.4)    | 6.0 (21.6)    | 7.0 (24.3)    | 7.6 (24.7)    | 0.002  |
| Sugar                           | 0.9 (2.5)     | 0.1 (0.6)     | 0.3 (1.2)     | 0.8 (2.1)     | 2.4 (4.0)     | <0.001 |
| Nut                             | 5.2 (9.1)     | 1.1 (2.9)     | 2.5 (4.7)     | 5.0 (7.1)     | 12.3 (13.3)   | <0.001 |
| Guangdong dimsum                | 29.3 (37.4)   | 22.8 (33.4)   | 28.4 (36.1)   | 30.8 (38.1)   | 35.0 (40.7)   | <0.001 |
| Cantonese soup                  | 115.2 (110.2) | 132.3 (125.2) | 108.5 (107.2) | 109.8 (102.6) | 110.1 (102.5) | <0.001 |
| Tea (cup/day)                   | 5.1 (4.7)     | 5.3 (5.0)     | 5.0 (4.7)     | 4.9 (4.6)     | 5.0 (4.5)     | 0.10   |
| Alcohol use                     | 8.8 (44.7)    | 16.4 (62.7)   | 7.0 (39.0)    | 6.4 (37.7)    | 5.5 (32.2)    | <0.001 |
| Nutrients                       |               |               |               |               |               |        |
| Protein (g/day)                 | 72.1 (22.8)   | 68.2 (20.8)   | 66.8 (21.2)   | 71.4 (21.8)   | 82.1 (24.2)   | <0.001 |
| Fat (g/day)                     | 57.8 (23.4)   | 56.5 (25.1)   | 53.5 (22.3)   | 56.4 (22.0)   | 64.8 (22.5)   | <0.001 |
| Carbohydrate (g/day)            | 260.6 (85.6)  | 284.1 (86.3)  | 244.8 (81.6)  | 247.3 (83.7)  | 256.1 (84.8)  | <0.001 |

|                               |                 |                 |                 |                 |                 |        |
|-------------------------------|-----------------|-----------------|-----------------|-----------------|-----------------|--------|
| Fiber (g/day)                 | 13.1 (6.1)      | 11.5 (4.8)      | 11.8 (5.3)      | 13.1 (5.9)      | 16.1 (7.0)      | <0.001 |
| Cholesterol (mg/day)          | 148.0 (78.7)    | 85.9 (43.3)     | 127.0 (48.0)    | 161.1 (59.3)    | 217.9 (87.8)    | <0.001 |
| Saturated fatty (g/day)       | 10.0 (5.1)      | 8.4 (4.2)       | 8.8 (4.3)       | 10.2 (4.9)      | 12.8 (5.6)      | <0.001 |
| Monounsaturated fatty (g/day) | 17.3 (8.8)      | 17.4 (9.9)      | 16.2 (8.5)      | 16.8 (8.4)      | 18.7 (8.2)      | <0.001 |
| Polyunsaturated fatty (g/day) | 13.0 (8.3)      | 13.5 (9.1)      | 11.9 (7.7)      | 12.3 (7.7)      | 14.2 (8.4)      | <0.001 |
| Vitamin A (µg/day)            | 619.0 (490.2)   | 494.4 (401.2)   | 559.6 (432.3)   | 630.0 (479.0)   | 792.4 (578.8)   | <0.001 |
| Vitamin B1 (µg/day)           | 1.0 (0.4)       | 0.9 (0.4)       | 0.9 (0.4)       | 1.0 (0.4)       | 1.2 (0.4)       | <0.001 |
| Vitamin B2 (µg/day)           | 1.0 (0.4)       | 0.9 (0.3)       | 0.9 (0.4)       | 1.0 (0.4)       | 1.1 (0.4)       | <0.001 |
| Vitamin B3 (µg/day)           | 23.5 (7.3)      | 24.7 (7.4)      | 22.2 (6.9)      | 22.3 (6.9)      | 24.6 (7.5)      | <0.001 |
| Vitamin C (mg/day)            | 97.5 (61.4)     | 83.7 (54.8)     | 90.1 (57.9)     | 96.9 (56.4)     | 119.1 (69.6)    | <0.001 |
| Vitamin E (mg/day)            | 18.4 (9.5)      | 18.8 (10.2)     | 17.1 (9.1)      | 17.6 (8.8)      | 20.0 (9.6)      | <0.001 |
| Sodium (mg/day)               | 932.7 (648.5)   | 877.00 (497.5)  | 850.6 (464.8)   | 932.8 (977.1)   | 1,070 (485.4)   | <0.001 |
| Potassium (mg/day)            | 1,659.2 (604.2) | 1,504.0 (544.5) | 1,527.7 (564.7) | 1,656.2 (564.2) | 1,949.2 (633.5) | <0.001 |
| Phosphorus (mg/day)           | 1,077.8 (338.2) | 1,040.5 (300.1) | 991.9 (313.4)   | 1,058.2 (328.5) | 1,220.6 (363.1) | <0.001 |
| Calcium (mg/day)              | 502.0 (235.0)   | 415.7 (181.3)   | 447.1 (212.3)   | 510.6 (218.3)   | 634 (259.4)     | <0.001 |
| Magnesium (mg/day)            | 303.2 (128.0)   | 277.3 (91.8)    | 269.9 (109.7)   | 300.6 (129.6)   | 364.8 (150.6)   | <0.001 |
| Iron (mg/day)                 | 22.3 (7.6)      | 21.7 (6.7)      | 20.5 (7.0)      | 21.7 (7.5)      | 25.2 (8.3)      | <0.001 |
| Copper (mg/day)               | 3.8 (4.2)       | 4.0 (5.3)       | 3.5 (3.8)       | 3.6 (3.9)       | 3.9 (3.7)       | 0.09   |
| Zinc (mg/day)                 | 11.6 (3.4)      | 11.7 (3.2)      | 10.8 (3.2)      | 11.2 (3.3)      | 12.7 (3.7)      | <0.001 |
| Selenium (mg/day)             | 50.1 (20.9)     | 45.9 (20.4)     | 46.8 (19.3)     | 49.8(19.1)      | 57.9 (22.6)     | <0.001 |
| Manganese (mg/day)            | 5.6 (2.3)       | 5.6 (1.8)       | 5.1 (2.0)       | 5.4 (2.4)       | 6.3 (2.7)       | <0.001 |

Data are presented as mean (SD)



**Supplementary Table 4** Association of dietary pattern scores with all-cause, cancer, CVD and other-cause mortality by excluding deaths during first three years follow-up

|                                          | Quartiles of dietary pattern score |                    |                    |                     | P for trend |
|------------------------------------------|------------------------------------|--------------------|--------------------|---------------------|-------------|
|                                          | Q1                                 | Q2                 | Q3                 | Q4                  |             |
| <b>Vegetable-based dietary pattern</b>   |                                    |                    |                    |                     |             |
| All-cause mortality                      |                                    |                    |                    |                     |             |
| Adjusted HR (95% CI) <sup>1</sup>        | 1.00                               | 1.08 (0.99-1.18)   | 1.06 (0.97-1.17)   | 1.06 (0.98-1.19)    | 0.17        |
| CVD mortality                            |                                    |                    |                    |                     |             |
| Adjusted HR (95% CI) <sup>1</sup>        | 1.00                               | 1.02 (0.88-1.18)   | 1.15 (0.98-1.35)   | 1.09 (0.93-1.26)    | 0.18        |
| Cancer mortality                         |                                    |                    |                    |                     |             |
| Adjusted HR (95% CI) <sup>1</sup>        | 1.00                               | 1.19 (0.98-1.39)   | 1.09 (0.90-1.24)   | 1.14 (0.95-1.34)    | 0.11        |
| Other-cause mortality                    |                                    |                    |                    |                     |             |
| Adjusted HR (95% CI) <sup>1</sup>        | 1.00                               | 0.99 (0.84-1.16)   | 0.95 (0.80-1.12)   | 0.98 (0.83-1.17)    | 0.77        |
| <b>Healthy Cantonese dietary pattern</b> |                                    |                    |                    |                     |             |
| All-cause mortality                      |                                    |                    |                    |                     |             |
| Adjusted HR (95% CI) <sup>1</sup>        | 1.00                               | 0.92 (0.85-0.99) * | 0.90 (0.83-0.98) * | 0.87 (0.80-0.96) ** | 0.002       |
| CVD mortality                            |                                    |                    |                    |                     |             |
| Adjusted HR (95% CI) <sup>1</sup>        | 1.00                               | 0.85 (0.75-0.96) * | 0.84 (0.73-0.96) * | 0.83 (0.71-0.96) *  | 0.01        |
| Cancer mortality                         |                                    |                    |                    |                     |             |
| Adjusted HR (95% CI) <sup>1</sup>        | 1.00                               | 1.04 (0.89-1.20)   | 0.97 (0.83-1.13)   | 0.93 (0.78-1.10)    | 0.24        |
| Other-cause mortality                    |                                    |                    |                    |                     |             |
| Adjusted HR (95% CI) <sup>1</sup>        | 1.00                               | 0.92 (0.79-1.07)   | 0.94 (0.80-1.10)   | 0.87 (0.73-1.03)    | 0.16        |
| <b>Unhealthy western dietary pattern</b> |                                    |                    |                    |                     |             |
| All-cause mortality                      |                                    |                    |                    |                     |             |
| Adjusted HR (95% CI) <sup>1</sup>        | 1.00                               | 1.01 (0.92-1.10)   | 1.02 (0.94-1.11)   | 1.09 (1.01-1.19) *  | 0.04        |
| CVD mortality                            |                                    |                    |                    |                     |             |
| Adjusted HR (95% CI) <sup>1</sup>        | 1.00                               | 1.09 (0.95-1.24)   | 1.06 (0.92-1.19)   | 1.13 (0.98-1.29)    | 0.12        |

|                                      |      |                  |                     |                     |        |  |
|--------------------------------------|------|------------------|---------------------|---------------------|--------|--|
| Cancer mortality                     |      |                  |                     |                     |        |  |
| Adjusted HR (95% CI) <sup>1</sup>    | 1.00 | 0.94 (0.80-1.10) | 0.98 (0.84-1.15)    | 1.11 (0.95-1.29)    | 0.15   |  |
| Other-cause mortality                |      |                  |                     |                     |        |  |
| Adjusted HR (95% CI) <sup>1</sup>    | 1.00 | 0.96 (0.82-1.14) | 0.99 (0.85-1.16)    | 1.00 (0.85-1.17)    | 0.90   |  |
| <b>Nut and fruit dietary pattern</b> |      |                  |                     |                     |        |  |
| All-cause mortality                  |      |                  |                     |                     |        |  |
| Adjusted HR (95% CI) <sup>1</sup>    | 1.00 | 0.99 (0.91-1.07) | 0.96 (0.89-1.05)    | 0.90 (0.83-0.98) *  | 0.03   |  |
| CVD mortality                        |      |                  |                     |                     |        |  |
| Adjusted HR (95% CI) <sup>1</sup>    | 1.00 | 0.97 (0.85-1.09) | 0.83 (0.72-0.95) ** | 0.80 (0.70-0.91) ** | <0.001 |  |
| Cancer mortality                     |      |                  |                     |                     |        |  |
| Adjusted HR (95% CI) <sup>1</sup>    | 1.00 | 1.04 (0.90-1.20) | 1.11 (0.95-1.29)    | 0.99 (0.86-1.16)    | 0.28   |  |
| Other-cause mortality                |      |                  |                     |                     |        |  |
| Adjusted HR (95% CI) <sup>1</sup>    | 1.00 | 0.95 (0.82-1.11) | 0.95 (0.82-1.11)    | 1.02 (0.87-1.18)    | 0.93   |  |

<sup>1</sup> Adjusted for sex, age, total energy intake, education, family income, smoking, alcohol use, physical activity, BMI, history of CVD (excluding stroke or myocardial infarction) and diabetes.

\*:<0.05; \*\*:<0.01; \*\*\*:<0.001

**Supplementary Table 5** Association of dietary pattern scores with cancer-specific and CVD-specific mortality by excluding deaths during first three years follow-up

|                                          | Quartiles of dietary pattern score |                    |                    |                    | P for trend |
|------------------------------------------|------------------------------------|--------------------|--------------------|--------------------|-------------|
|                                          | Q1                                 | Q2                 | Q3                 | Q4                 |             |
| <b>Cancer-specific</b>                   |                                    |                    |                    |                    |             |
| <b>Vegetable-based dietary pattern</b>   |                                    |                    |                    |                    |             |
| Lung cancer mortality                    |                                    |                    |                    |                    |             |
| Adjusted HR (95% CI) <sup>1</sup>        | 1.00                               | 1.13 (0.85-1.51)   | 1.11 (0.83-1.49)   | 1.35 (0.98-1.84)   | 0.08        |
| Liver cancer mortality                   |                                    |                    |                    |                    |             |
| Adjusted HR (95% CI) <sup>1</sup>        | 1.00                               | 1.60 (1.06-2.39) * | 1.25 (0.82-1.92)   | 1.45 (0.95-2.23)   | 0.31        |
| Stomach cancer mortality                 |                                    |                    |                    |                    |             |
| Adjusted HR (95% CI) <sup>1</sup>        | 1.00                               | 1.44 (0.72-2.89)   | 1.06 (0.50-2.24)   | 0.75 (0.32-1.71)   | 0.30        |
| Esophageal cancer mortality              |                                    |                    |                    |                    |             |
| Adjusted HR (95% CI) <sup>1</sup>        | 1.00                               | 0.51 (0.19-1.34)   | 0.59 (0.24-1.49)   | 0.59 (0.22-1.53)   | 0.38        |
| Intestines cancer mortality              |                                    |                    |                    |                    |             |
| Adjusted HR (95% CI) <sup>1</sup>        | 1.00                               | 1.34 (0.88-2.02)   | 1.19 (0.77-1.83)   | 1.28 (0.82-2.00)   | 0.45        |
| <b>Healthy Cantonese dietary pattern</b> |                                    |                    |                    |                    |             |
| Lung cancer mortality                    |                                    |                    |                    |                    |             |
| Adjusted HR (95% CI) <sup>1</sup>        | 1.00                               | 0.99 (0.77-1.27)   | 0.75 (0.56-0.98) * | 0.77 (0.57-0.99) * | 0.02        |
| Liver cancer mortality                   |                                    |                    |                    |                    |             |
| Adjusted HR (95% CI) <sup>1</sup>        | 1.00                               | 1.07 (0.74-1.53)   | 1.10 (0.76-1.59)   | 0.86 (0.57-1.31)   | 0.53        |
| Stomach cancer mortality                 |                                    |                    |                    |                    |             |
| Adjusted HR (95% CI) <sup>1</sup>        | 1.00                               | 1.44 (0.71-2.92)   | 1.13 (0.52-2.46)   | 1.65 (0.75-3.63)   | 0.33        |
| Esophageal cancer mortality              |                                    |                    |                    |                    |             |
| Adjusted HR (95% CI) <sup>1</sup>        | 1.00                               | 0.95 (0.35-2.57)   | 1.42 (0.56-3.60)   | 1.04 (0.37-2.96)   | 0.76        |
| Intestines cancer mortality              |                                    |                    |                    |                    |             |
| Adjusted HR (95% CI) <sup>1</sup>        | 1.00                               | 1.27 (0.86-1.86)   | 1.09 (0.72-1.66)   | 1.16 (0.74-1.81)   | 0.72        |

|                                          |      |                  |                  |                  |      |
|------------------------------------------|------|------------------|------------------|------------------|------|
| <b>Unhealthy western dietary pattern</b> |      |                  |                  |                  |      |
| Lung cancer mortality                    |      |                  |                  |                  |      |
| Adjusted HR (95% CI) <sup>1</sup>        | 1.00 | 0.89 (0.66-1.19) | 1.01 (0.77-1.33) | 0.93 (0.71-1.23) | 0.88 |
| Liver cancer mortality                   |      |                  |                  |                  |      |
| Adjusted HR (95% CI) <sup>1</sup>        | 1.00 | 0.85 (0.58-1.24) | 0.81 (0.56-1.19) | 1.20 (0.84-1.70) | 0.30 |
| Stomach cancer mortality                 |      |                  |                  |                  |      |
| Adjusted HR (95% CI) <sup>1</sup>        | 1.00 | 1.00 (0.47-2.08) | 1.02 (0.49-2.11) | 1.15 (0.56-2.35) | 0.70 |
| Esophageal cancer mortality              |      |                  |                  |                  |      |
| Adjusted HR (95% CI) <sup>1</sup>        | 1.00 | 0.42 (0.13-1.33) | 0.65 (0.24-1.72) | 1.42 (0.61-3.29) | 0.26 |
| Intestines cancer mortality              |      |                  |                  |                  |      |
| Adjusted HR (95% CI) <sup>1</sup>        | 1.00 | 0.93 (0.61-1.41) | 1.14 (0.77-1.69) | 1.22 (0.82-1.82) | 0.21 |
| <b>Nut and fruit dietary pattern</b>     |      |                  |                  |                  |      |
| Lung cancer mortality                    |      |                  |                  |                  |      |
| Adjusted HR (95% CI) <sup>1</sup>        | 1.00 | 1.23 (0.95-1.58) | 1.06 (0.81-1.39) | 1.25 (0.96-1.64) | 0.22 |
| Liver cancer mortality                   |      |                  |                  |                  |      |
| Adjusted HR (95% CI) <sup>1</sup>        | 1.00 | 1.00 (0.70-1.43) | 1.10 (0.77-1.55) | 1.07 (0.75-1.53) | 0.61 |
| Stomach cancer mortality                 |      |                  |                  |                  |      |
| Adjusted HR (95% CI) <sup>1</sup>        | 1.00 | 1.17 (0.59-2.35) | 0.80 (0.37-1.77) | 1.80 (0.92-3.50) | 0.15 |
| Esophageal cancer mortality              |      |                  |                  |                  |      |
| Adjusted HR (95% CI) <sup>1</sup>        | 1.00 | 1.85 (0.75-4.61) | 1.36 (0.51-3.58) | 1.70 (0.66-4.40) | 0.41 |
| Intestines cancer mortality              |      |                  |                  |                  |      |
| Adjusted HR (95% CI) <sup>1</sup>        | 1.00 | 0.91 (0.62-1.32) | 0.70 (0.47-1.05) | 1.02 (0.70-1.48) | 0.75 |
| <b>CVD-specific</b>                      |      |                  |                  |                  |      |
| <b>Vegetable-based dietary pattern</b>   |      |                  |                  |                  |      |
| Hypertensive heart disease mortality     |      |                  |                  |                  |      |
| Adjusted HR (95% CI) <sup>1</sup>        | 1.00 | 1.20 (0.76-1.90) | 1.28 (0.81-2.02) | 1.51 (0.95-2.41) | 0.08 |

|                                          |      |                     |                     |                     |       |
|------------------------------------------|------|---------------------|---------------------|---------------------|-------|
| Ischemic heart disease mortality         |      |                     |                     |                     |       |
| Adjusted HR (95% CI) <sup>1</sup>        | 1.00 | 1.08 (0.87-1.34)    | 1.21 (0.98-1.49)    | 1.12 (0.90-1.39)    | 0.26  |
| Cerebrovascular disease mortality        |      |                     |                     |                     |       |
| Adjusted HR (95% CI) <sup>1</sup>        | 1.00 | 0.93 (0.74-1.17)    | 1.08 (0.86-1.35)    | 0.97 (0.76-1.23)    | 0.90  |
| <b>Healthy Cantonese dietary pattern</b> |      |                     |                     |                     |       |
| Hypertensive heart disease mortality     |      |                     |                     |                     |       |
| Adjusted HR (95% CI) <sup>1</sup>        | 1.00 | 0.89 (0.61-1.31)    | 0.89 (0.59-1.35)    | 0.88 (0.56-1.39)    | 0.58  |
| Ischemic heart disease mortality         |      |                     |                     |                     |       |
| Adjusted HR (95% CI) <sup>1</sup>        | 1.00 | 0.97 (0.80-1.16)    | 0.99 (0.82-1.21)    | 0.98 (0.79-1.21)    | 0.90  |
| Cerebrovascular disease mortality        |      |                     |                     |                     |       |
| Adjusted HR (95% CI) <sup>1</sup>        | 1.00 | 0.73 (0.60-0.90) ** | 0.72 (0.58-0.90) ** | 0.78 (0.62-0.98) *  | 0.03  |
| <b>Unhealthy western dietary pattern</b> |      |                     |                     |                     |       |
| Hypertensive heart disease mortality     |      |                     |                     |                     |       |
| Adjusted HR (95% CI) <sup>1</sup>        | 1.00 | 0.88 (0.58-1.33)    | 1.00 (0.67-1.48)    | 0.87 (0.57-1.31)    | 0.66  |
| Ischemic heart disease mortality         |      |                     |                     |                     |       |
| Adjusted HR (95% CI) <sup>1</sup>        | 1.00 | 1.18 (0.97-1.43)    | 1.01 (0.83-1.23)    | 1.04 (0.86-1.27)    | 0.93  |
| Cerebrovascular disease mortality        |      |                     |                     |                     |       |
| Adjusted HR (95% CI) <sup>1</sup>        | 1.00 | 1.00 (0.79-1.26)    | 1.07 (0.86-1.34)    | 1.28 (1.03-1.59) *  | 0.02  |
| <b>Nut and fruit dietary pattern</b>     |      |                     |                     |                     |       |
| Hypertensive heart disease mortality     |      |                     |                     |                     |       |
| Adjusted HR (95% CI) <sup>1</sup>        | 1.00 | 0.87 (0.60-1.29)    | 0.74 (0.48-1.12)    | 1.15 (0.78-1.69)    | 0.69  |
| Ischemic heart disease mortality         |      |                     |                     |                     |       |
| Adjusted HR (95% CI) <sup>1</sup>        | 1.00 | 1.02 (0.85-1.21)    | 0.84 (0.70-1.01)    | 0.83 (0.69-0.98) *  | 0.02  |
| Cerebrovascular disease mortality        |      |                     |                     |                     |       |
| Adjusted HR (95% CI) <sup>1</sup>        | 1.00 | 0.86 (0.71-1.05)    | 0.73 (0.59-0.89) ** | 0.73 (0.59-0.91) ** | 0.001 |

<sup>1</sup> Adjusted for age, sex, total energy intake, education, family income, smoking, alcohol use, physical activity, BMI, history of CVD (excluding stroke or myocardial infarction) and diabetes.

\*:<0.05; \*\*:<0.01; \*\*\*:<0.001

**Supplementary Table 6** Association of dietary pattern scores with all-cause, cancer, CVD and other-cause mortality by further adjusting for the aspirin or other antiplatelet medications regularly

|                                          | Quartiles of dietary pattern score |                    |                    |                     | P for trend |
|------------------------------------------|------------------------------------|--------------------|--------------------|---------------------|-------------|
|                                          | Q1                                 | Q2                 | Q3                 | Q4                  |             |
| <b>Vegetable-based dietary pattern</b>   |                                    |                    |                    |                     |             |
| All-cause mortality                      |                                    |                    |                    |                     |             |
| Adjusted HR (95% CI) <sup>1</sup>        | 1.00                               | 1.08 (0.98-1.17)   | 1.07 (0.98-1.17)   | 1.07 (0.98-1.20)    | 0.10        |
| CVD mortality                            |                                    |                    |                    |                     |             |
| Adjusted HR (95% CI) <sup>1</sup>        | 1.00                               | 1.05 (0.91-1.21)   | 1.19 (0.98-1.37)   | 1.12 (0.96-1.30)    | 0.07        |
| Cancer mortality                         |                                    |                    |                    |                     |             |
| Adjusted HR (95% CI) <sup>1</sup>        | 1.00                               | 1.22 (1.05-1.43) * | 1.06 (0.90-1.25)   | 1.16 (0.96-1.40)    | 0.23        |
| Other-cause mortality                    |                                    |                    |                    |                     |             |
| Adjusted HR (95% CI) <sup>1</sup>        | 1.00                               | 0.97 (0.82-1.14)   | 0.96 (0.82-1.13)   | 1.00 (0.84-1.18)    | 0.99        |
| <b>Healthy Cantonese dietary pattern</b> |                                    |                    |                    |                     |             |
| All-cause mortality                      |                                    |                    |                    |                     |             |
| Adjusted HR (95% CI) <sup>1</sup>        | 1.00                               | 0.91 (0.84-0.98) * | 0.90 (0.83-0.98) * | 0.87 (0.80-0.96) ** | 0.005       |

|                                          |      |                    |                     |                     |        |
|------------------------------------------|------|--------------------|---------------------|---------------------|--------|
| <hr/>                                    |      |                    |                     |                     |        |
| CVD mortality                            |      |                    |                     |                     |        |
| Adjusted HR (95% CI) <sup>1</sup>        | 1.00 | 0.85 (0.75-0.96) * | 0.83 (0.73-0.96) ** | 0.84 (0.73-0.97) *  | 0.01   |
| Cancer mortality                         |      |                    |                     |                     |        |
| Adjusted HR (95% CI) <sup>1</sup>        | 1.00 | 1.02 (0.88-1.18)   | 0.96 (0.83-1.12)    | 0.91 (0.77-1.08)    | 0.20   |
| Other-cause mortality                    |      |                    |                     |                     |        |
| Adjusted HR (95% CI) <sup>1</sup>        | 1.00 | 0.91 (0.78-1.05)   | 0.94 (0.81-1.10)    | 0.87 (0.73-1.03)    | 0.15   |
| <b>Unhealthy western dietary pattern</b> |      |                    |                     |                     |        |
| All-cause mortality                      |      |                    |                     |                     |        |
| Adjusted HR (95% CI) <sup>1</sup>        | 1.00 | 1.02 (0.93-1.11)   | 1.02 (0.93-1.11)    | 1.10 (1.01-1.19) *  | 0.04   |
| CVD mortality                            |      |                    |                     |                     |        |
| Adjusted HR (95% CI) <sup>1</sup>        | 1.00 | 1.09 (0.95-1.24)   | 1.04 (0.91-1.19)    | 1.12 (0.98-1.28)    | 0.15   |
| Cancer mortality                         |      |                    |                     |                     |        |
| Adjusted HR (95% CI) <sup>1</sup>        | 1.00 | 0.96 (0.82-1.12)   | 0.98 (0.84-1.14)    | 1.11 (0.95-1.29)    | 0.15   |
| Other-cause mortality                    |      |                    |                     |                     |        |
| Adjusted HR (95% CI) <sup>1</sup>        | 1.00 | 0.99 (0.84-1.16)   | 1.00 (0.86-1.17)    | 1.01 (0.87-1.18)    | 0.84   |
| <b>Nut and fruit dietary pattern</b>     |      |                    |                     |                     |        |
| All-cause mortality                      |      |                    |                     |                     |        |
| Adjusted HR (95% CI) <sup>1</sup>        | 1.00 | 0.99 (0.91-1.07)   | 0.97 (0.90-1.06)    | 0.92 (0.85-0.99) *  | 0.03   |
| CVD mortality                            |      |                    |                     |                     |        |
| Adjusted HR (95% CI) <sup>1</sup>        | 1.00 | 0.95 (0.84-1.07)   | 0.84 (0.72-0.95) ** | 0.81 (0.72-0.92) ** | <0.001 |
| Cancer mortality                         |      |                    |                     |                     |        |
| Adjusted HR (95% CI) <sup>1</sup>        | 1.00 | 1.07 (0.92-1.23)   | 1.13 (0.98-1.31)    | 1.00 (0.87-1.16)    | 0.17   |
| Other-cause mortality                    |      |                    |                     |                     |        |
| Adjusted HR (95% CI) <sup>1</sup>        | 1.00 | 0.96 (0.83-1.11)   | 0.99 (0.85-1.14)    | 1.02 (0.88-1.19)    | 0.76   |
| <hr/>                                    |      |                    |                     |                     |        |

<sup>1</sup> Adjusted for sex, age and energy, education, family income, smoking, alcohol use, physical activity, BMI, history of CVD (excluding stroke or myocardial infarction), diabetes and the aspirin or other antiplatelet medications regularly.

\*:<0.05; \*\*:<0.01; \*\*\*:<0.001

**Supplementary Table 7** Association of dietary pattern scores with cancer-specific and CVD-specific mortality by further adjusting for the aspirin or other antiplatelet medications regularly

|                                        | Quartiles of dietary pattern score |                  |                  |                  | P for trend |
|----------------------------------------|------------------------------------|------------------|------------------|------------------|-------------|
|                                        | Q1                                 | Q2               | Q3               | Q4               |             |
| <b>Cancer-specific</b>                 |                                    |                  |                  |                  |             |
| <b>Vegetable-based dietary pattern</b> |                                    |                  |                  |                  |             |
| Lung cancer mortality                  |                                    |                  |                  |                  |             |
| Adjusted HR (95% CI) <sup>1</sup>      | 1.00                               | 1.06 (0.81-1.39) | 1.01 (0.77-1.34) | 1.23 (0.93-1.62) | 0.18        |
| Liver cancer mortality                 |                                    |                  |                  |                  |             |
| Adjusted HR (95% CI) <sup>1</sup>      | 1.00                               | 1.41 (0.96-2.06) | 1.25 (0.84-1.85) | 1.33 (0.89-2.00) | 0.34        |
| Stomach cancer mortality               |                                    |                  |                  |                  |             |
| Adjusted HR (95% CI) <sup>1</sup>      | 1.00                               | 1.30 (0.67-2.53) | 1.01 (0.50-2.06) | 0.78 (0.36-1.68) | 0.35        |
| Esophageal cancer mortality            |                                    |                  |                  |                  |             |
| Adjusted HR (95% CI) <sup>1</sup>      | 1.00                               | 0.58 (0.23-1.46) | 0.60 (0.22-1.60) | 0.68 (0.25-1.84) | 0.57        |
| Intestines cancer mortality            |                                    |                  |                  |                  |             |
| Adjusted HR (95% CI) <sup>1</sup>      | 1.00                               | 1.39 (0.92-2.08) | 1.20 (0.78-1.84) | 1.29 (0.80-1.97) | 0.52        |



---

| <b>Healthy Cantonese dietary pattern</b> |      |                  |                    |                    |  |      |
|------------------------------------------|------|------------------|--------------------|--------------------|--|------|
| Lung cancer mortality                    |      |                  |                    |                    |  |      |
| Adjusted HR (95% CI) <sup>1</sup>        | 1.00 | 0.93 (0.73-1.18) | 0.72 (0.55-0.94) * | 0.77 (0.58-0.99) * |  | 0.03 |
| Liver cancer mortality                   |      |                  |                    |                    |  |      |
| Adjusted HR (95% CI) <sup>1</sup>        | 1.00 | 1.15 (0.79-1.67) | 1.25 (0.86-1.82)   | 1.02 (0.67-1.55)   |  | 0.86 |
| Stomach cancer mortality                 |      |                  |                    |                    |  |      |
| Adjusted HR (95% CI) <sup>1</sup>        | 1.00 | 1.32 (0.66-2.64) | 1.25 (0.60-2.62)   | 1.16 (0.52-2.60)   |  | 0.77 |
| Esophageal cancer mortality              |      |                  |                    |                    |  |      |
| Adjusted HR (95% CI) <sup>1</sup>        | 1.00 | 1.09 (0.41-2.86) | 1.57 (0.62-3.94)   | 1.11 (0.39-3.13)   |  | 0.69 |
| Intestines cancer mortality              |      |                  |                    |                    |  |      |
| Adjusted HR (95% CI) <sup>1</sup>        | 1.00 | 1.33 (0.89-1.99) | 1.09 (0.70-1.69)   | 1.17 (0.73-1.88)   |  | 0.76 |
| <b>Unhealthy western dietary pattern</b> |      |                  |                    |                    |  |      |
| Lung cancer mortality                    |      |                  |                    |                    |  |      |
| Adjusted HR (95% CI) <sup>1</sup>        | 1.00 | 0.96 (0.73-1.26) | 1.00 (0.77-1.30)   | 0.92 (0.70-1.20)   |  | 0.59 |
| Liver cancer mortality                   |      |                  |                    |                    |  |      |
| Adjusted HR (95% CI) <sup>1</sup>        | 1.00 | 0.87 (0.60-1.26) | 0.82 (0.57-1.19)   | 1.29 (0.92-1.81)   |  | 0.13 |
| Stomach cancer mortality                 |      |                  |                    |                    |  |      |
| Adjusted HR (95% CI) <sup>1</sup>        | 1.00 | 0.98 (0.47-2.06) | 1.12 (0.55-2.26)   | 1.37 (0.69-2.73)   |  | 0.32 |
| Esophageal cancer mortality              |      |                  |                    |                    |  |      |
| Adjusted HR (95% CI) <sup>1</sup>        | 1.00 | 0.47 (0.16-1.34) | 0.56 (0.22-1.47)   | 1.18 (0.52-2.67)   |  | 0.54 |
| Intestines cancer mortality              |      |                  |                    |                    |  |      |
| Adjusted HR (95% CI) <sup>1</sup>        | 1.00 | 0.99 (0.66-1.50) | 1.16 (0.78-1.72)   | 1.27 (0.86-1.90)   |  | 0.17 |
| <b>Nut and fruit dietary pattern</b>     |      |                  |                    |                    |  |      |
| Lung cancer mortality                    |      |                  |                    |                    |  |      |
| Adjusted HR (95% CI) <sup>1</sup>        | 1.00 | 1.19 (0.93-1.52) | 1.08 (0.84-1.39)   | 1.26 (0.98-1.62)   |  | 0.14 |
| Liver cancer mortality                   |      |                  |                    |                    |  |      |

---

|                                          |      |                     |                     |                  |      |
|------------------------------------------|------|---------------------|---------------------|------------------|------|
| Adjusted HR (95% CI) <sup>1</sup>        | 1.00 | 1.03 (0.73-1.44)    | 1.13 (0.81-1.58)    | 1.11 (0.79-1.57) | 0.45 |
| Stomach cancer mortality                 |      |                     |                     |                  |      |
| Adjusted HR (95% CI) <sup>1</sup>        | 1.00 | 1.25 (0.65-2.39)    | 0.75 (0.35-1.60)    | 1.89 (0.98-3.55) | 0.12 |
| Esophageal cancer mortality              |      |                     |                     |                  |      |
| Adjusted HR (95% CI) <sup>1</sup>        | 1.00 | 2.00 (0.82-4.90)    | 1.56 (0.61-4.03)    | 1.80 (0.70-4.65) | 0.34 |
| Intestines cancer mortality              |      |                     |                     |                  |      |
| Adjusted HR (95% CI) <sup>1</sup>        | 1.00 | 0.92 (0.64-1.32)    | 0.69 (0.47-1.03)    | 1.00 (0.69-1.45) | 0.66 |
| <b>CVD-specific</b>                      |      |                     |                     |                  |      |
| <b>Vegetable-based dietary pattern</b>   |      |                     |                     |                  |      |
| Hypertensive heart disease mortality     |      |                     |                     |                  |      |
| Adjusted HR (95% CI) <sup>1</sup>        | 1.00 | 1.28 (0.81-2.02)    | 1.42 (0.90-2.24)    | 1.61 (0.98-2.58) | 0.07 |
| Ischemic heart disease mortality         |      |                     |                     |                  |      |
| Adjusted HR (95% CI) <sup>1</sup>        | 1.00 | 1.11 (0.90-1.37)    | 1.25 (0.98-1.55)    | 1.16 (0.93-1.44) | 0.16 |
| Cerebrovascular disease mortality        |      |                     |                     |                  |      |
| Adjusted HR (95% CI) <sup>1</sup>        | 1.00 | 0.95 (0.76-1.20)    | 1.07 (0.86-1.34)    | 0.97 (0.77-1.23) | 0.96 |
| <b>Typical dietary pattern</b>           |      |                     |                     |                  |      |
| Hypertensive heart disease mortality     |      |                     |                     |                  |      |
| Adjusted HR (95% CI) <sup>1</sup>        | 1.00 | 0.87 (0.60-1.27)    | 0.87 (0.58-1.30)    | 0.85 (0.54-1.34) | 0.49 |
| Ischemic heart disease mortality         |      |                     |                     |                  |      |
| Adjusted HR (95% CI) <sup>1</sup>        | 1.00 | 0.98 (0.82-1.18)    | 0.99 (0.82-1.20)    | 0.98 (0.80-1.22) | 0.93 |
| Cerebrovascular disease mortality        |      |                     |                     |                  |      |
| Adjusted HR (95% CI) <sup>1</sup>        | 1.00 | 0.72 (0.59-0.88) ** | 0.72 (0.58-0.90) ** | 0.80 (0.63-0.98) | 0.03 |
| <b>Unhealthy western dietary pattern</b> |      |                     |                     |                  |      |
| Hypertensive heart disease mortality     |      |                     |                     |                  |      |
| Adjusted HR (95% CI) <sup>1</sup>        | 1.00 | 0.88 (0.58-1.33)    | 1.01 (0.68-1.49)    | 0.92 (0.61-1.38) | 0.85 |
| Ischemic heart disease mortality         |      |                     |                     |                  |      |

|                                      |      |                  |                     |                     |       |
|--------------------------------------|------|------------------|---------------------|---------------------|-------|
| Adjusted HR (95% CI) <sup>1</sup>    | 1.00 | 1.15 (0.95-1.40) | 0.99 (0.82-1.20)    | 1.03 (0.85-1.24)    | 0.81  |
| Cerebrovascular disease mortality    |      |                  |                     |                     |       |
| Adjusted HR (95% CI) <sup>1</sup>    | 1.00 | 1.02 (0.82-1.28) | 1.07 (0.86-1.34)    | 1.28 (1.03-1.58) *  | 0.02  |
| <b>Nut and fruit dietary pattern</b> |      |                  |                     |                     |       |
| Hypertensive heart disease mortality |      |                  |                     |                     |       |
| Adjusted HR (95% CI) <sup>1</sup>    | 1.00 | 0.86 (0.58-1.28) | 0.77 (0.51-1.16)    | 1.16 (0.79-1.69)    | 0.60  |
| Ischemic heart disease mortality     |      |                  |                     |                     |       |
| Adjusted HR (95% CI) <sup>1</sup>    | 1.00 | 1.00 (0.84-1.19) | 0.83 (0.69-0.99) *  | 0.83 (0.68-0.99) *  | 0.02  |
| Cerebrovascular disease mortality    |      |                  |                     |                     |       |
| Adjusted HR (95% CI) <sup>1</sup>    | 1.00 | 0.85 (0.70-1.04) | 0.75 (0.61-0.92) ** | 0.74 (0.60-0.91) ** | 0.002 |

<sup>1</sup> Adjusted for sex, age and energy, education, family income, smoking, alcohol use, physical activity, BMI, history of CVD (excluding stroke or myocardial infarction), diabetes and the aspirin or other antiplatelet medications regularly.

\*:<0.05; \*\*:<0.01; \*\*\*:<0.001

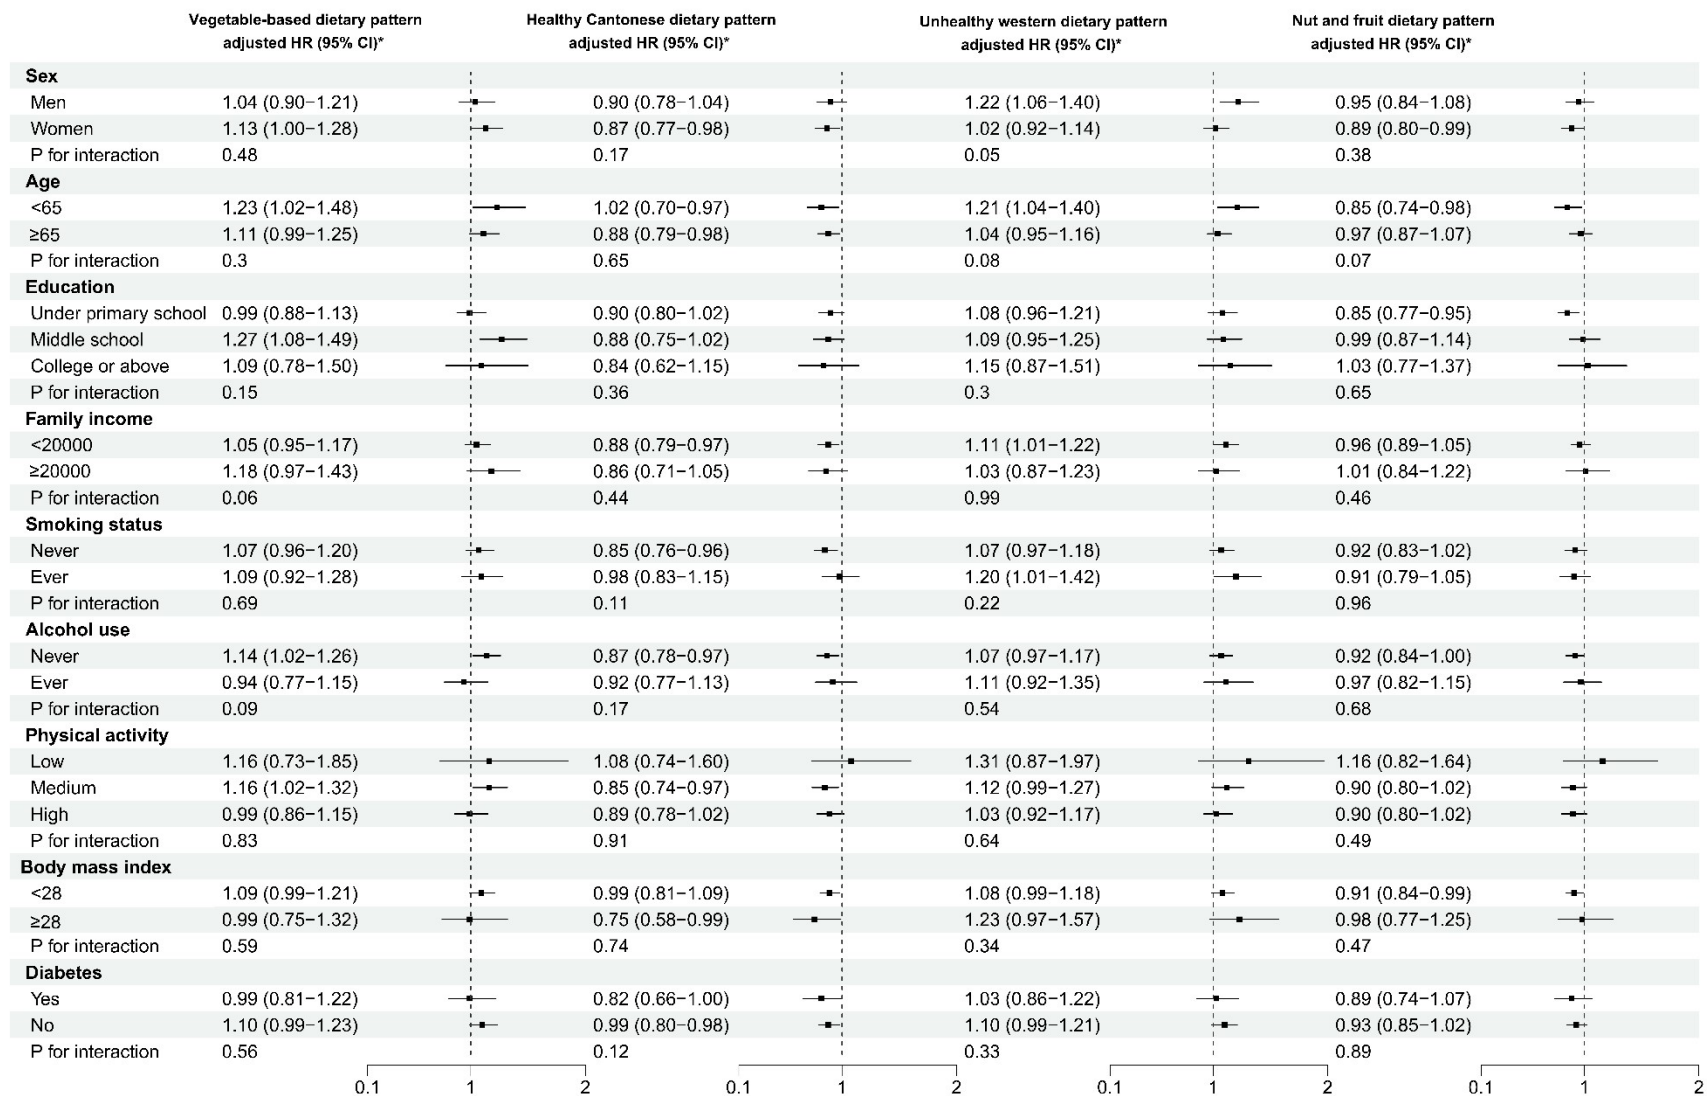

**Supplementary Figure 3** Association of four dietary pattern scores with all-cause mortality by subgroup. \*HRs and 95%CI of mortality analysis above were adjusted for sex, age, education, family income, smoking, alcohol use, physical activity, BMI, total energy intake, history of CVD (excluding stroke or myocardial infarction), diabetes except the corresponding subgroup variates. Dietary pattern scores in the lowest quartile (Q1) was used as reference group for all Cox models

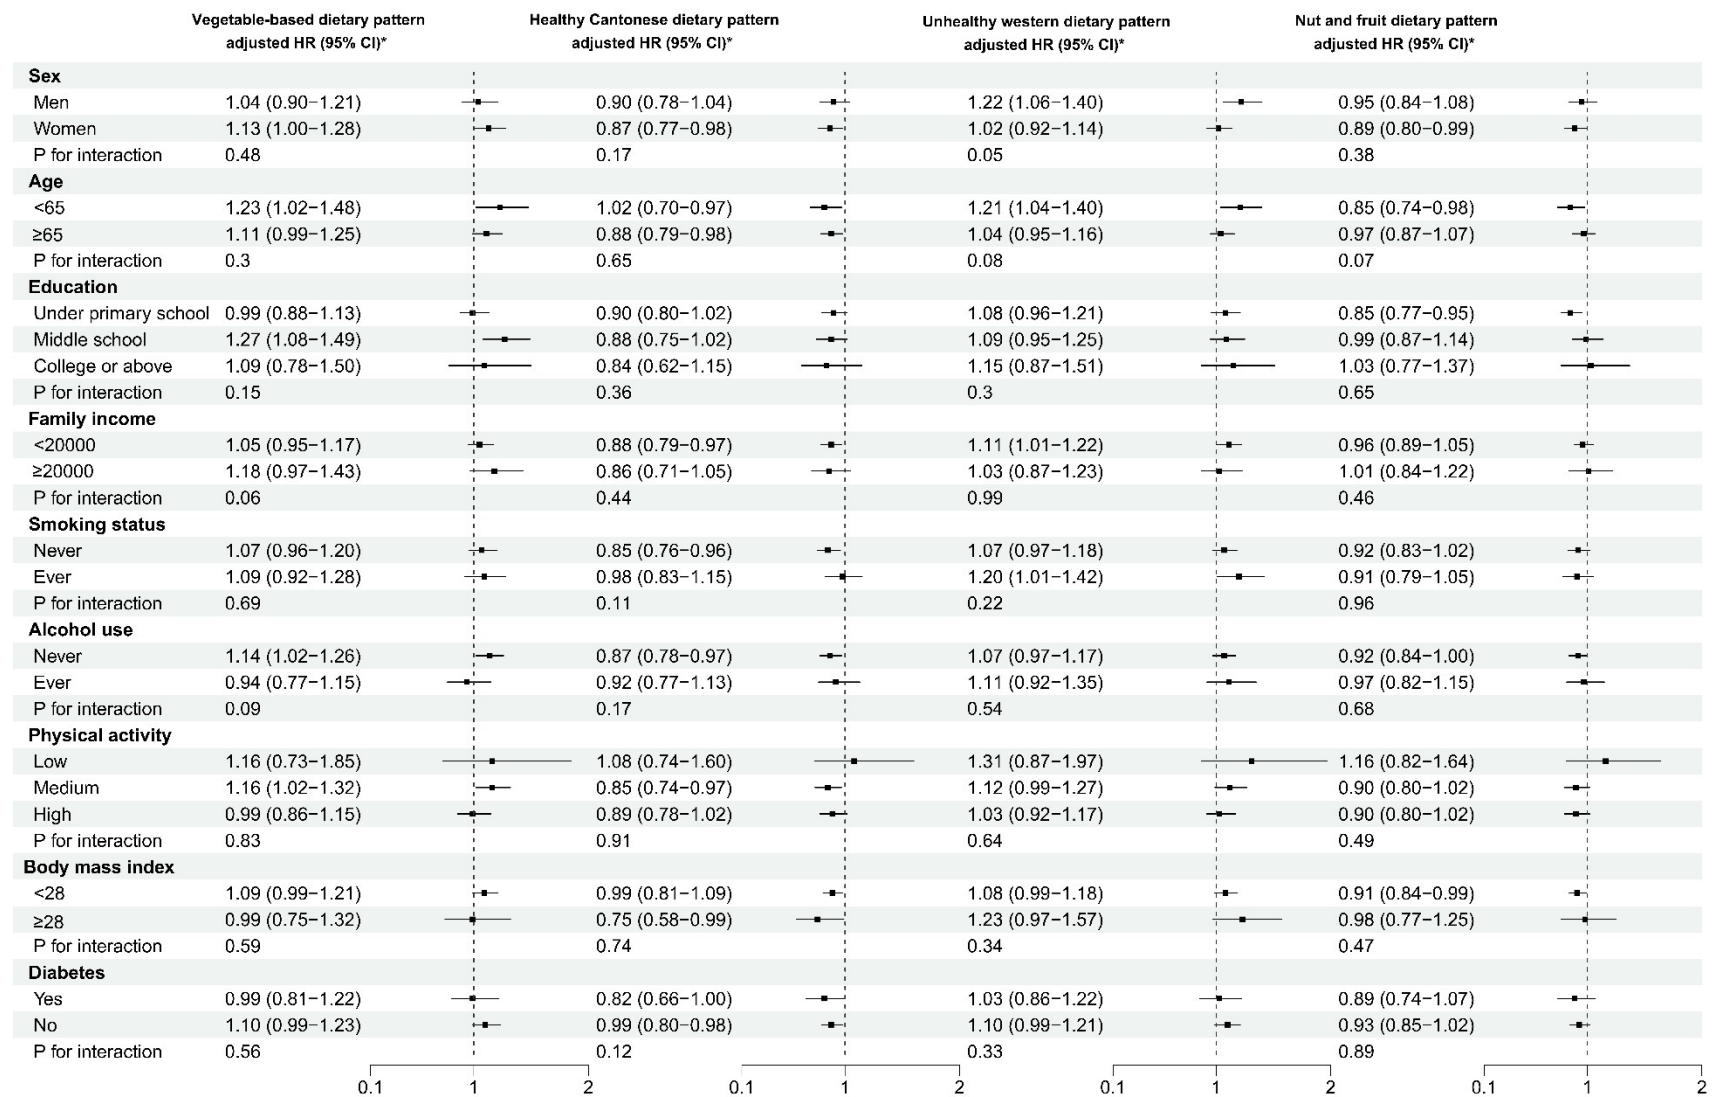

**Supplementary Figure 4** Association of four dietary pattern scores with CVD mortality by subgroup. \*HRs and 95%CI of mortality analysis above were adjusted for sex, age, education, family income, smoking, alcohol use, physical activity, BMI, total energy intake, history of CVD (excluding stroke or myocardial infarction), diabetes except the corresponding subgroup variates. Dietary pattern scores in the lowest quartile (Q1) was used as reference group for all Cox models

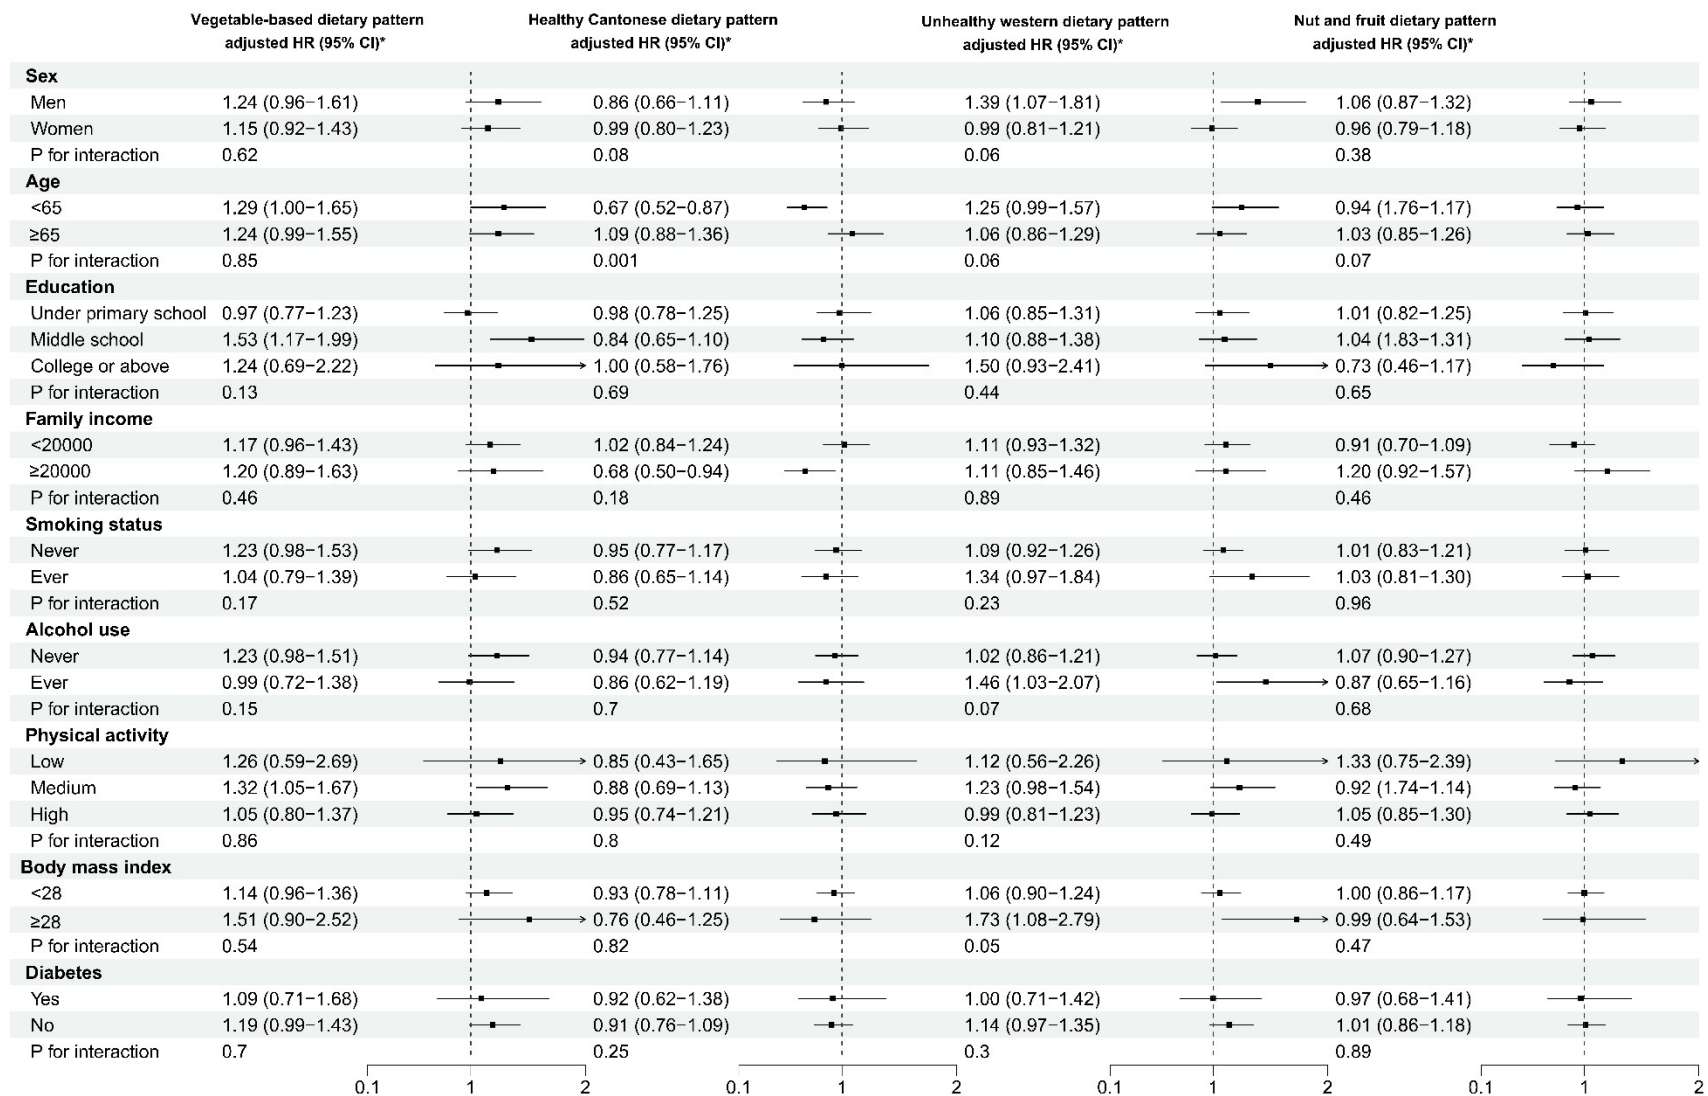



**Supplementary Figure 5** Association of four dietary pattern scores with cancer mortality by subgroup. \*HRs and 95%CI of mortality analysis above were adjusted for sex, age, education, family income, smoking, alcohol use, physical activity, BMI, total energy intake, history of CVD (excluding stroke or myocardial infarction), diabetes except the corresponding subgroup variates. Dietary pattern scores in the lowest quartile (Q1) was used as reference group for all Cox models

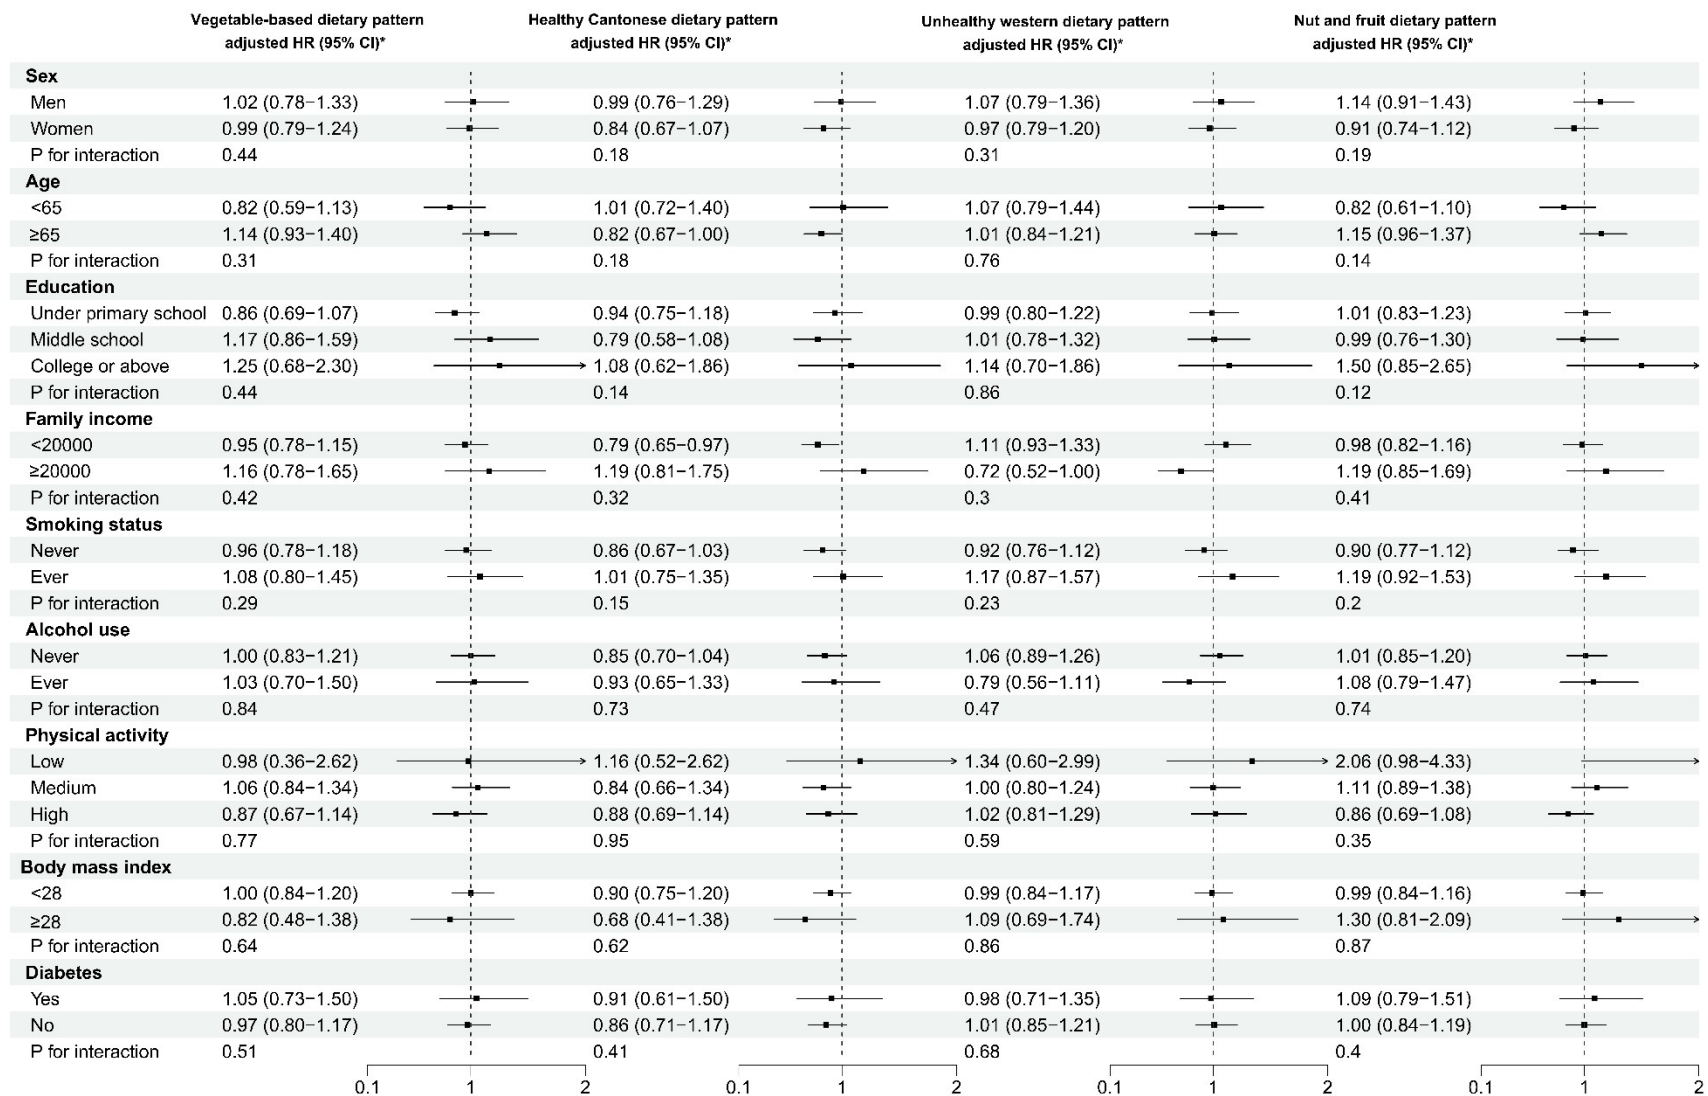

**Supplementary Figure 6** Association of four dietary pattern scores with other-cause mortality by subgroup. \*HRs and 95%CI of mortality analysis above were adjusted for sex, age, education, family income, smoking, alcohol use, physical activity, BMI, total energy intake, history of CVD (excluding stroke or myocardial infarction), diabetes except the corresponding subgroup variates. Dietary pattern scores in the lowest quartile (Q1) was used as reference group for all Cox models
